# Supplementary material for: Regional variations in human milk oligosaccharides in Vietnam suggest FucTx activity besides FucT2 and FucT3
Source: PubMed Central journal article supplement (PMC6235895; doi:10.1038/s41598-018-34882-x), 2018-11-14
Supplement: 41598_2018_34882_MOESM1_ESM.pdf [file 41598_2018_34882_MOESM1_ESM.pdf]

Supplementary Information belonging to:

**Regional variations in human milk oligosaccharides in Vietnam suggest FucTx activity besides FucT2 and FucT3**

Sander S. van Leeuwen,<sup>1,\*a</sup> Eline Stoutjesdijk,<sup>2</sup> Geert A. ten Kate,<sup>1</sup> Anne Schaafsma,<sup>3</sup> Janneke Dijk-Brouwer,<sup>2</sup> Frits A. J. Muskiet,<sup>2</sup> and Lubbert Dijkhuizen.<sup>1,b</sup>

<sup>1</sup> Microbial Physiology, Groningen Biomolecular Sciences and Biotechnology Institute (GBB), University of Groningen, Nijenborgh 7, 9747 AG, Groningen, The Netherlands

<sup>2</sup> Department of Laboratory Medicine, University Medical Center Groningen, University of Groningen, 9713 GZ Groningen, The Netherlands

<sup>3</sup> FrieslandCampina, Stationsplein 4, 3818 LE, Amersfoort, The Netherlands

<sup>a</sup>Current address: Department of Laboratory Medicine, University Medical Center Groningen, University of Groningen, 9713 GZ Groningen, The Netherlands

<sup>b</sup>Current address: CarbExplore Research BV, Zernikepark 12, 9747 AN Groningen, The Netherlands

\* Corresponding author : e-mail, [s.s.van.leeuwen@umcg.nl](mailto:s.s.van.leeuwen@umcg.nl); Fax, +31 503611746

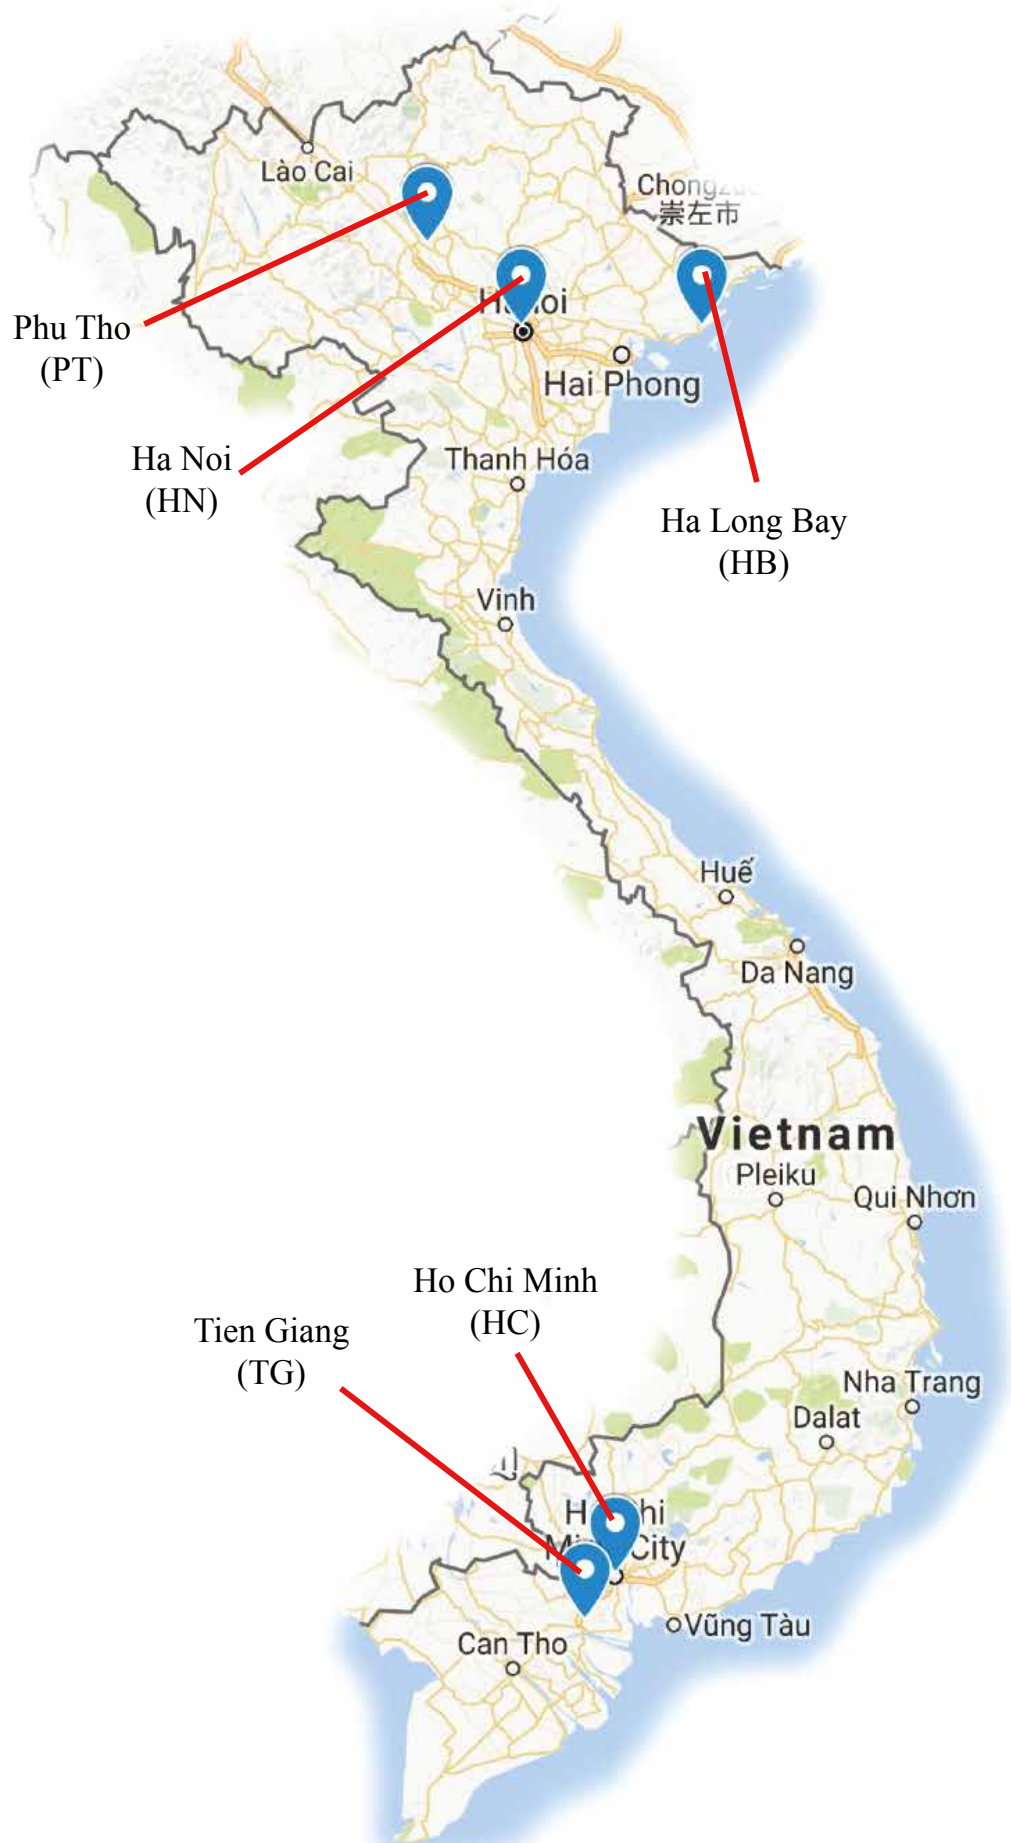

Map data © Google, SK telecom, ZENRIN

**Fig. S1.** Map of Vietnam indicating the 5 regions where participants were recruited. The map was derived from Google-maps (Google, SK telecom, ZENRIN) and modified in Adobe Photoshop CC2017.

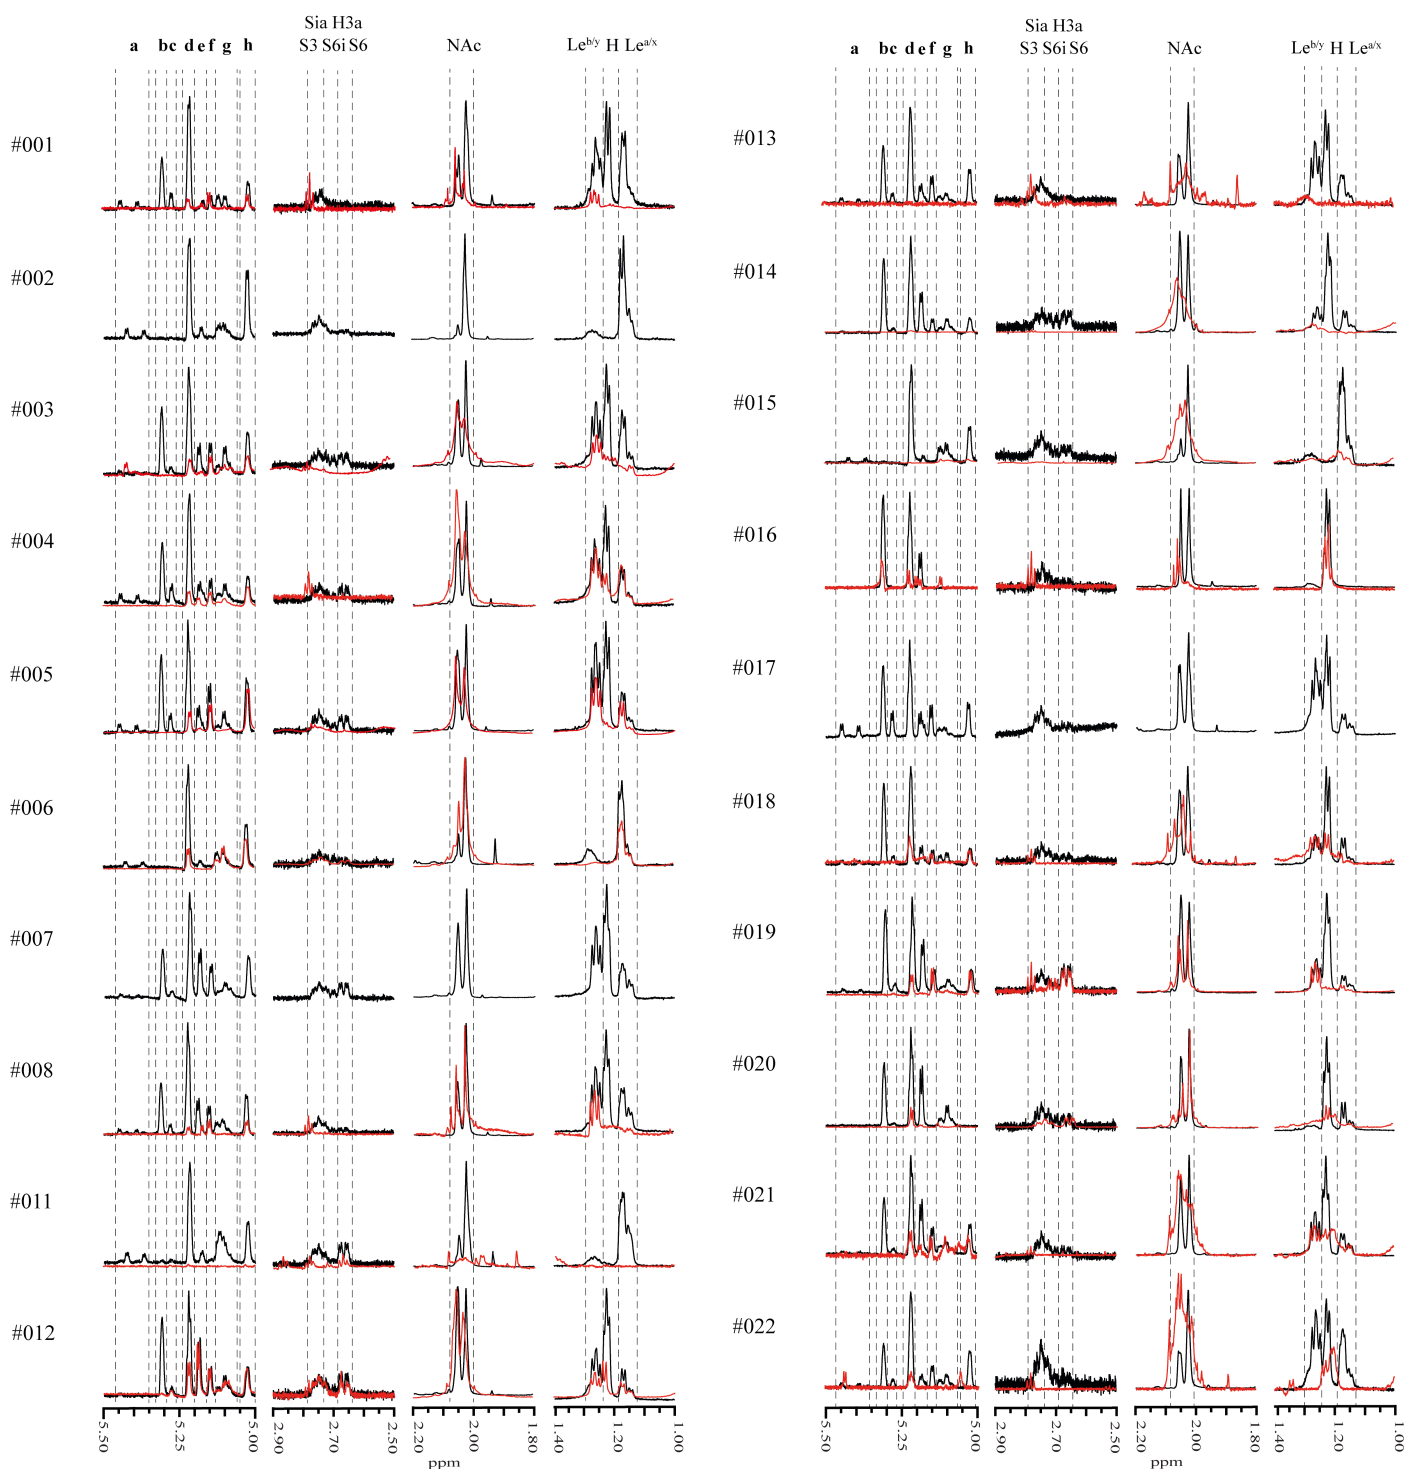

**Fig. S2.** Relevant parts of the 1D  $^1\text{H}$  NMR spectra of human milk oligosaccharides isolated from mothers' milk (black) and corresponding faeces (red). Parts 1 – 5 show samples from 1. Ha Long Bay, 2. Phu Tho, 3. Tien Giang, 4. Ho Chi Minh, 5. Ha Noi (Fig. S1).

(Fig. S2 – part 2)

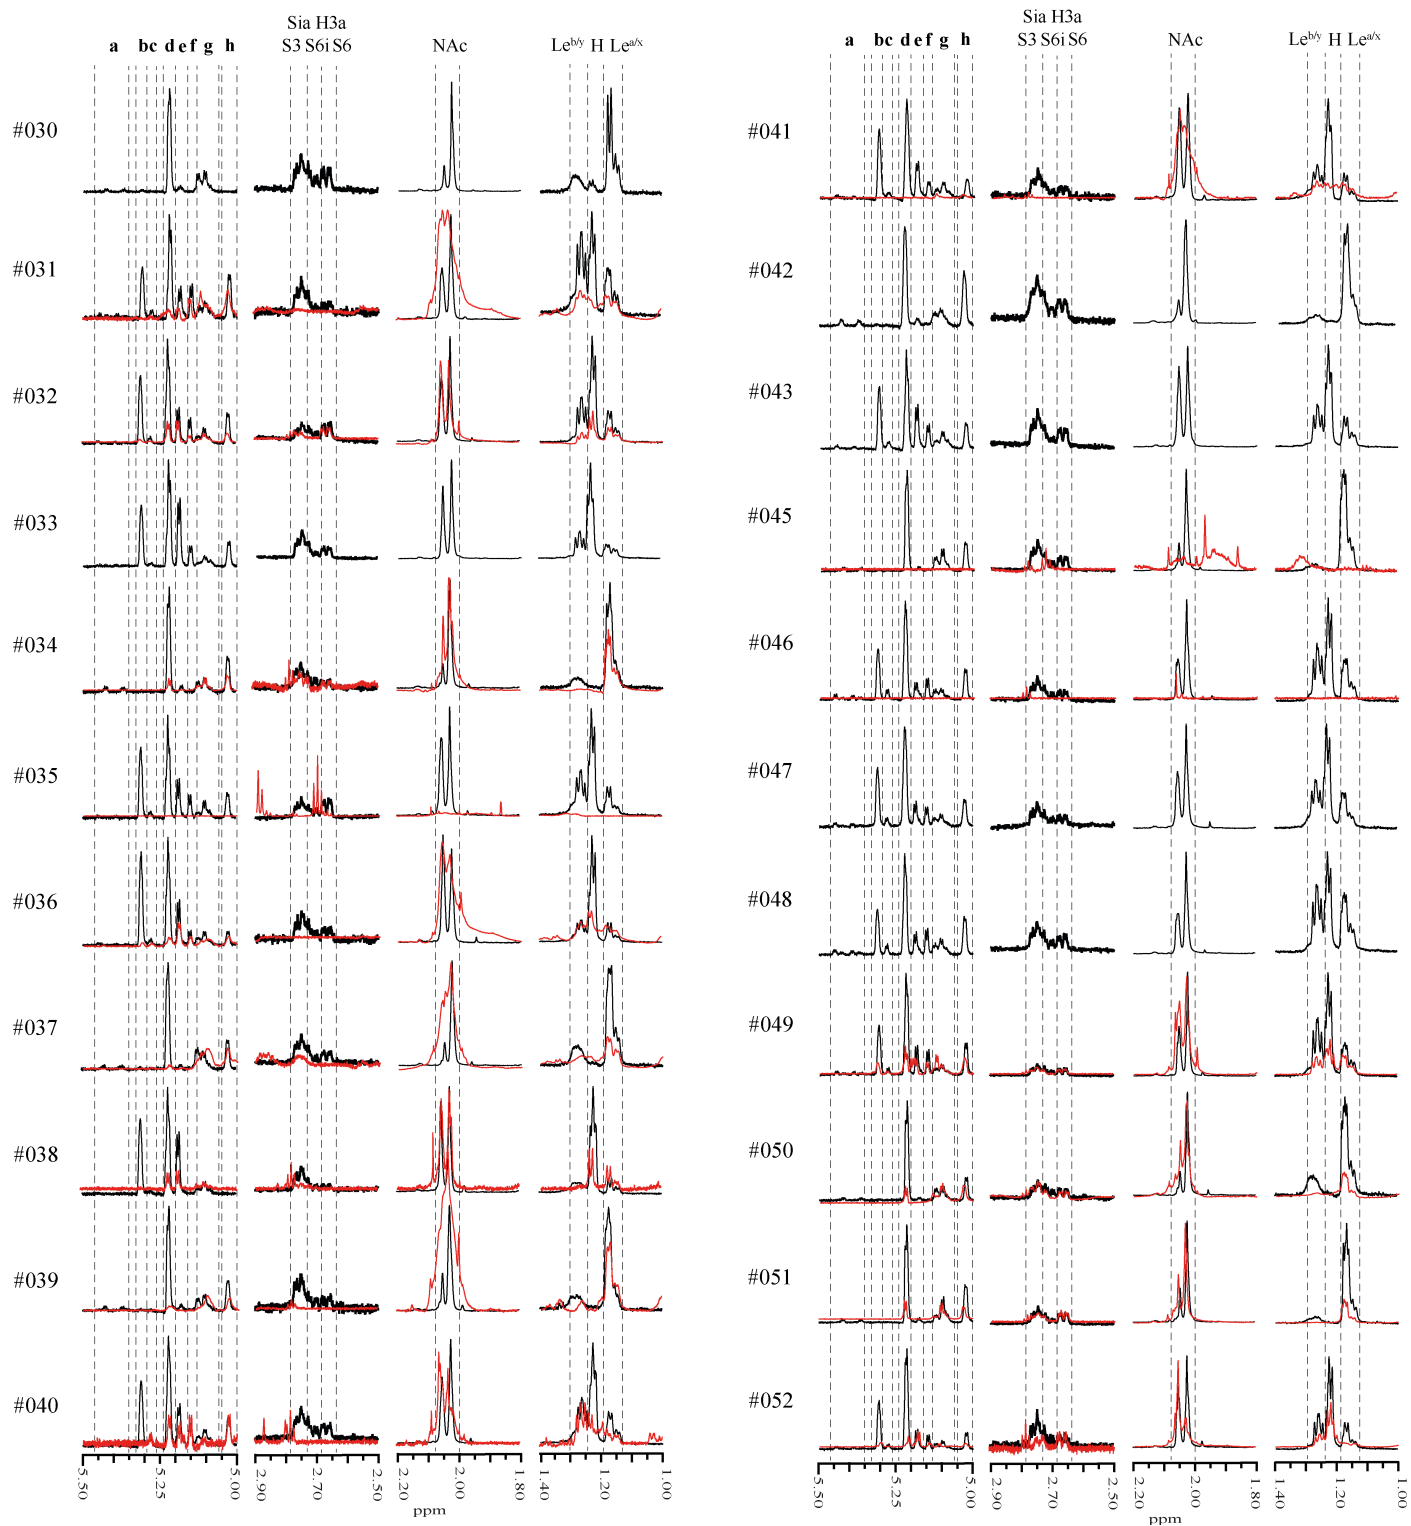

(Fig. S2 – part 3)

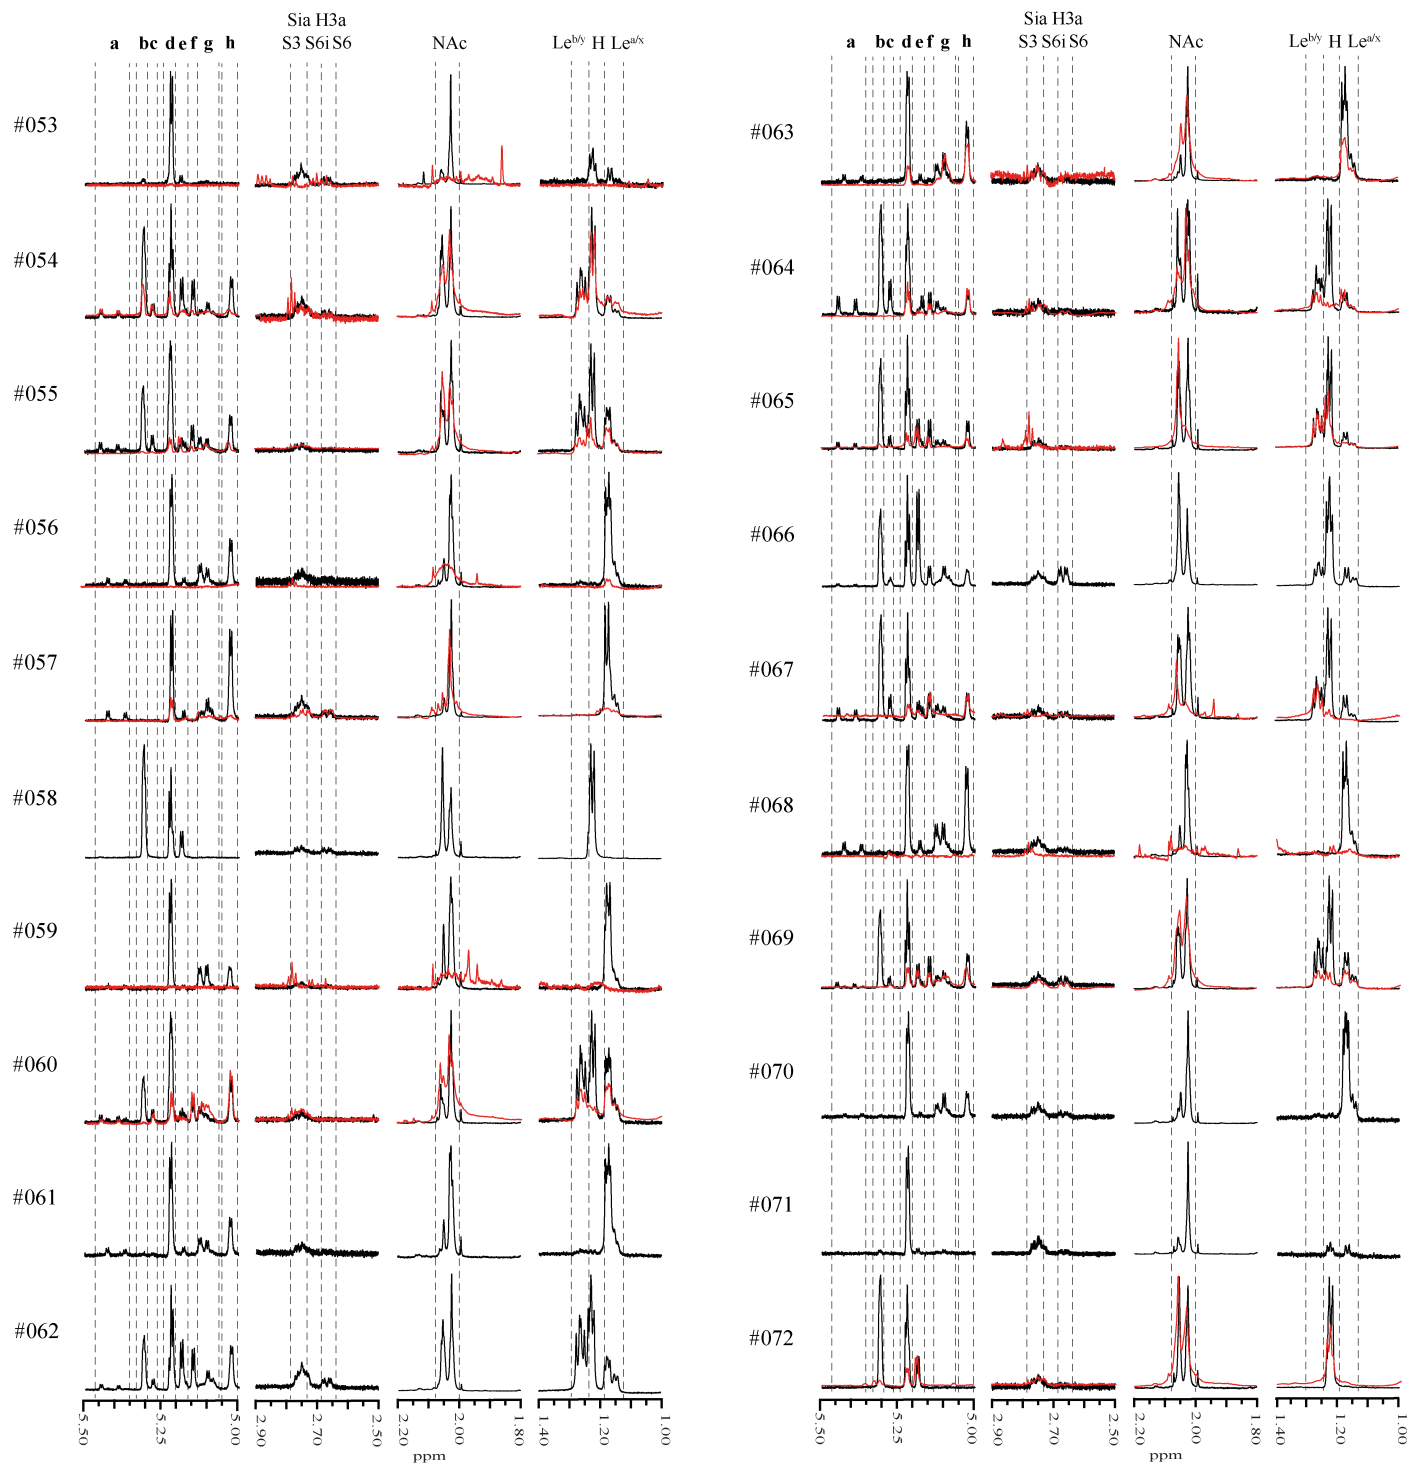

(Fig. S2 – part 4)

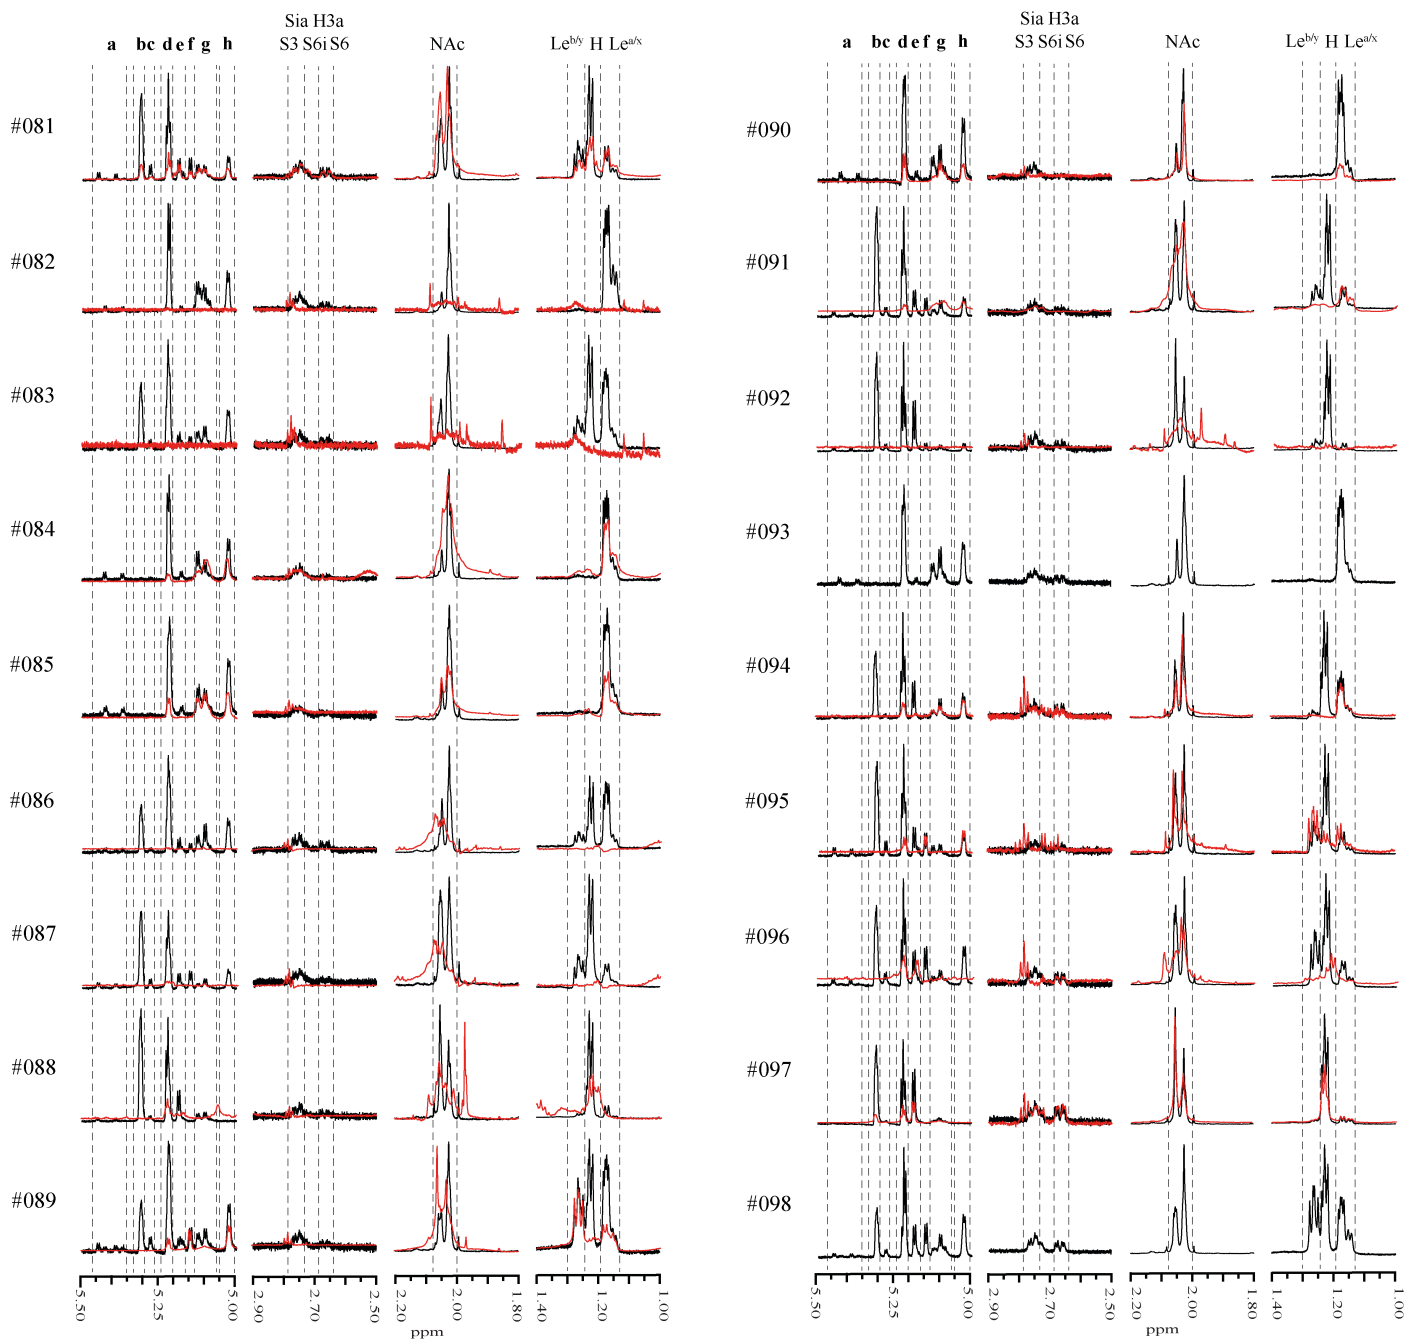

(Fig. S2 – part 5)

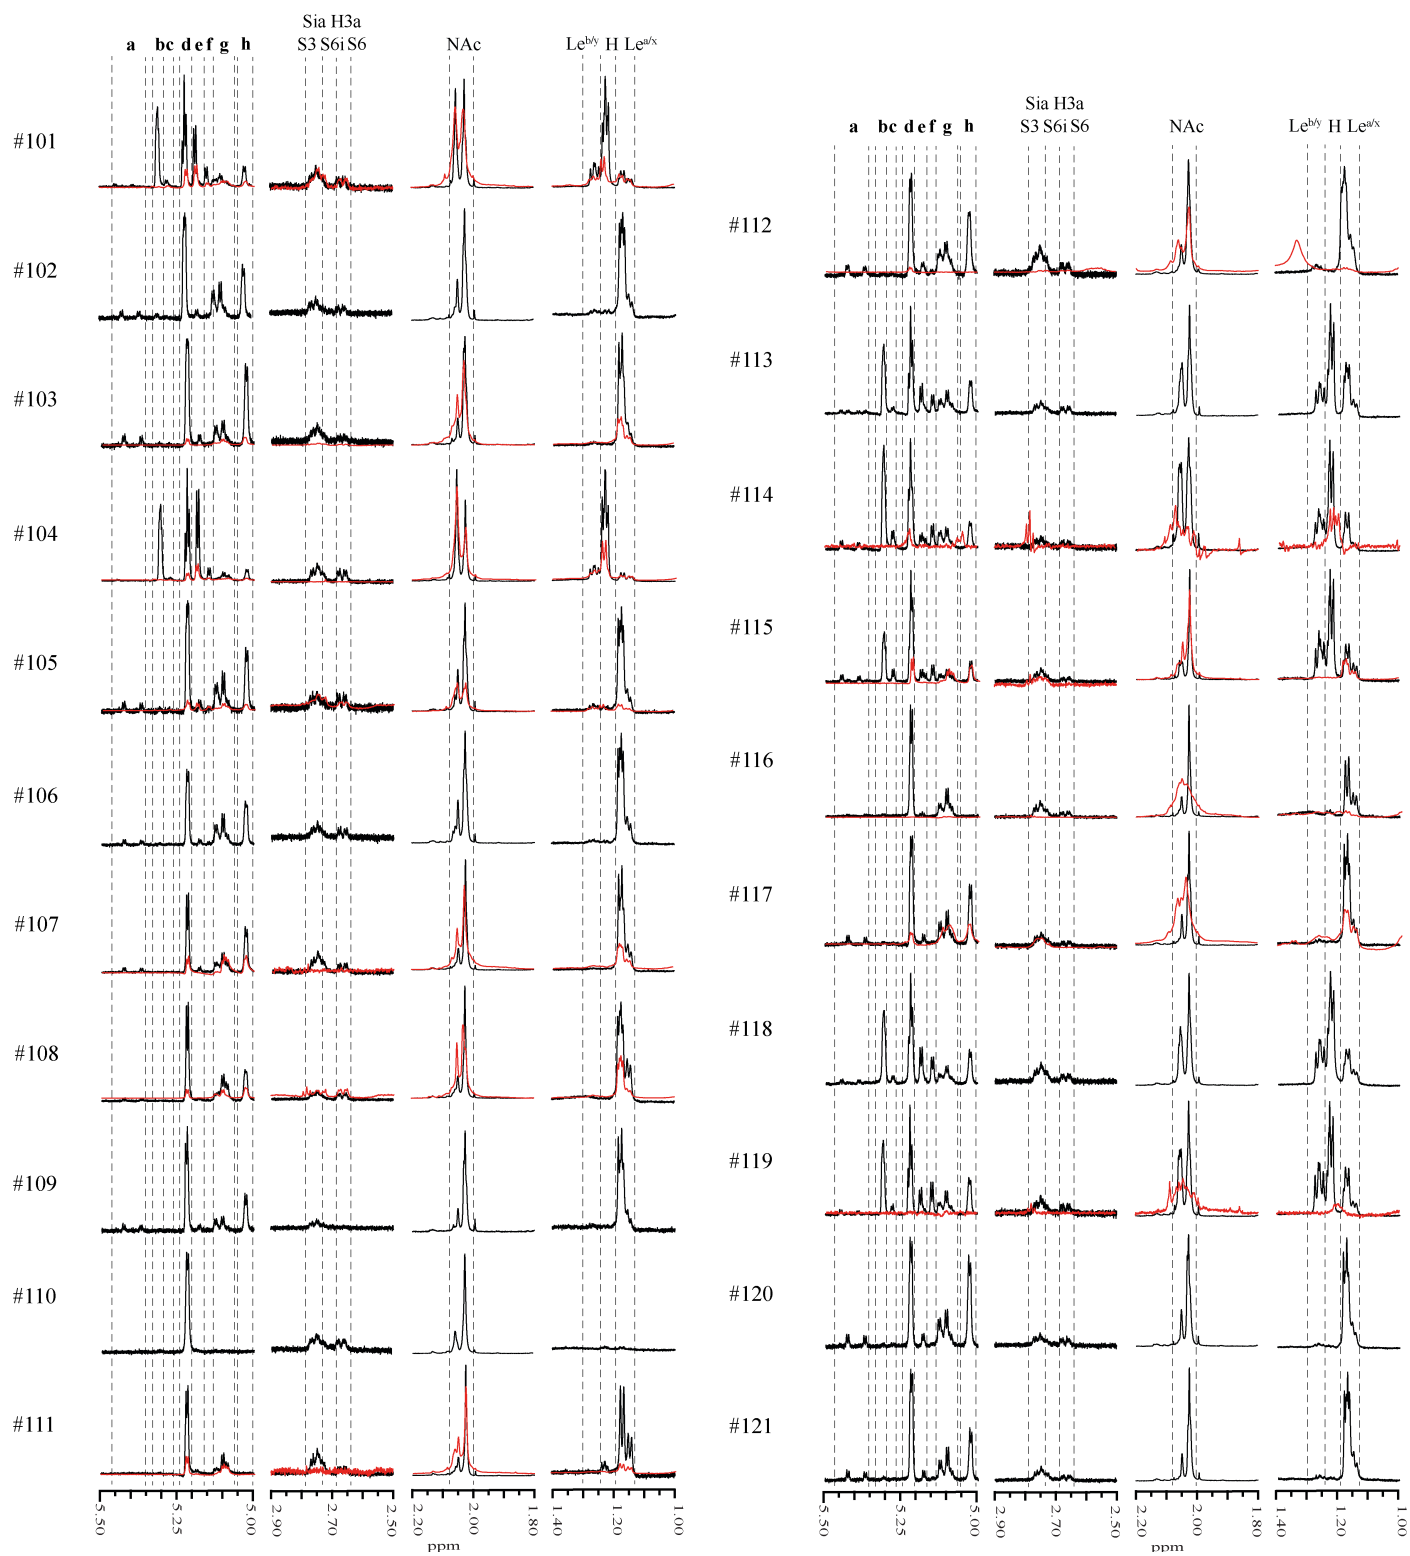

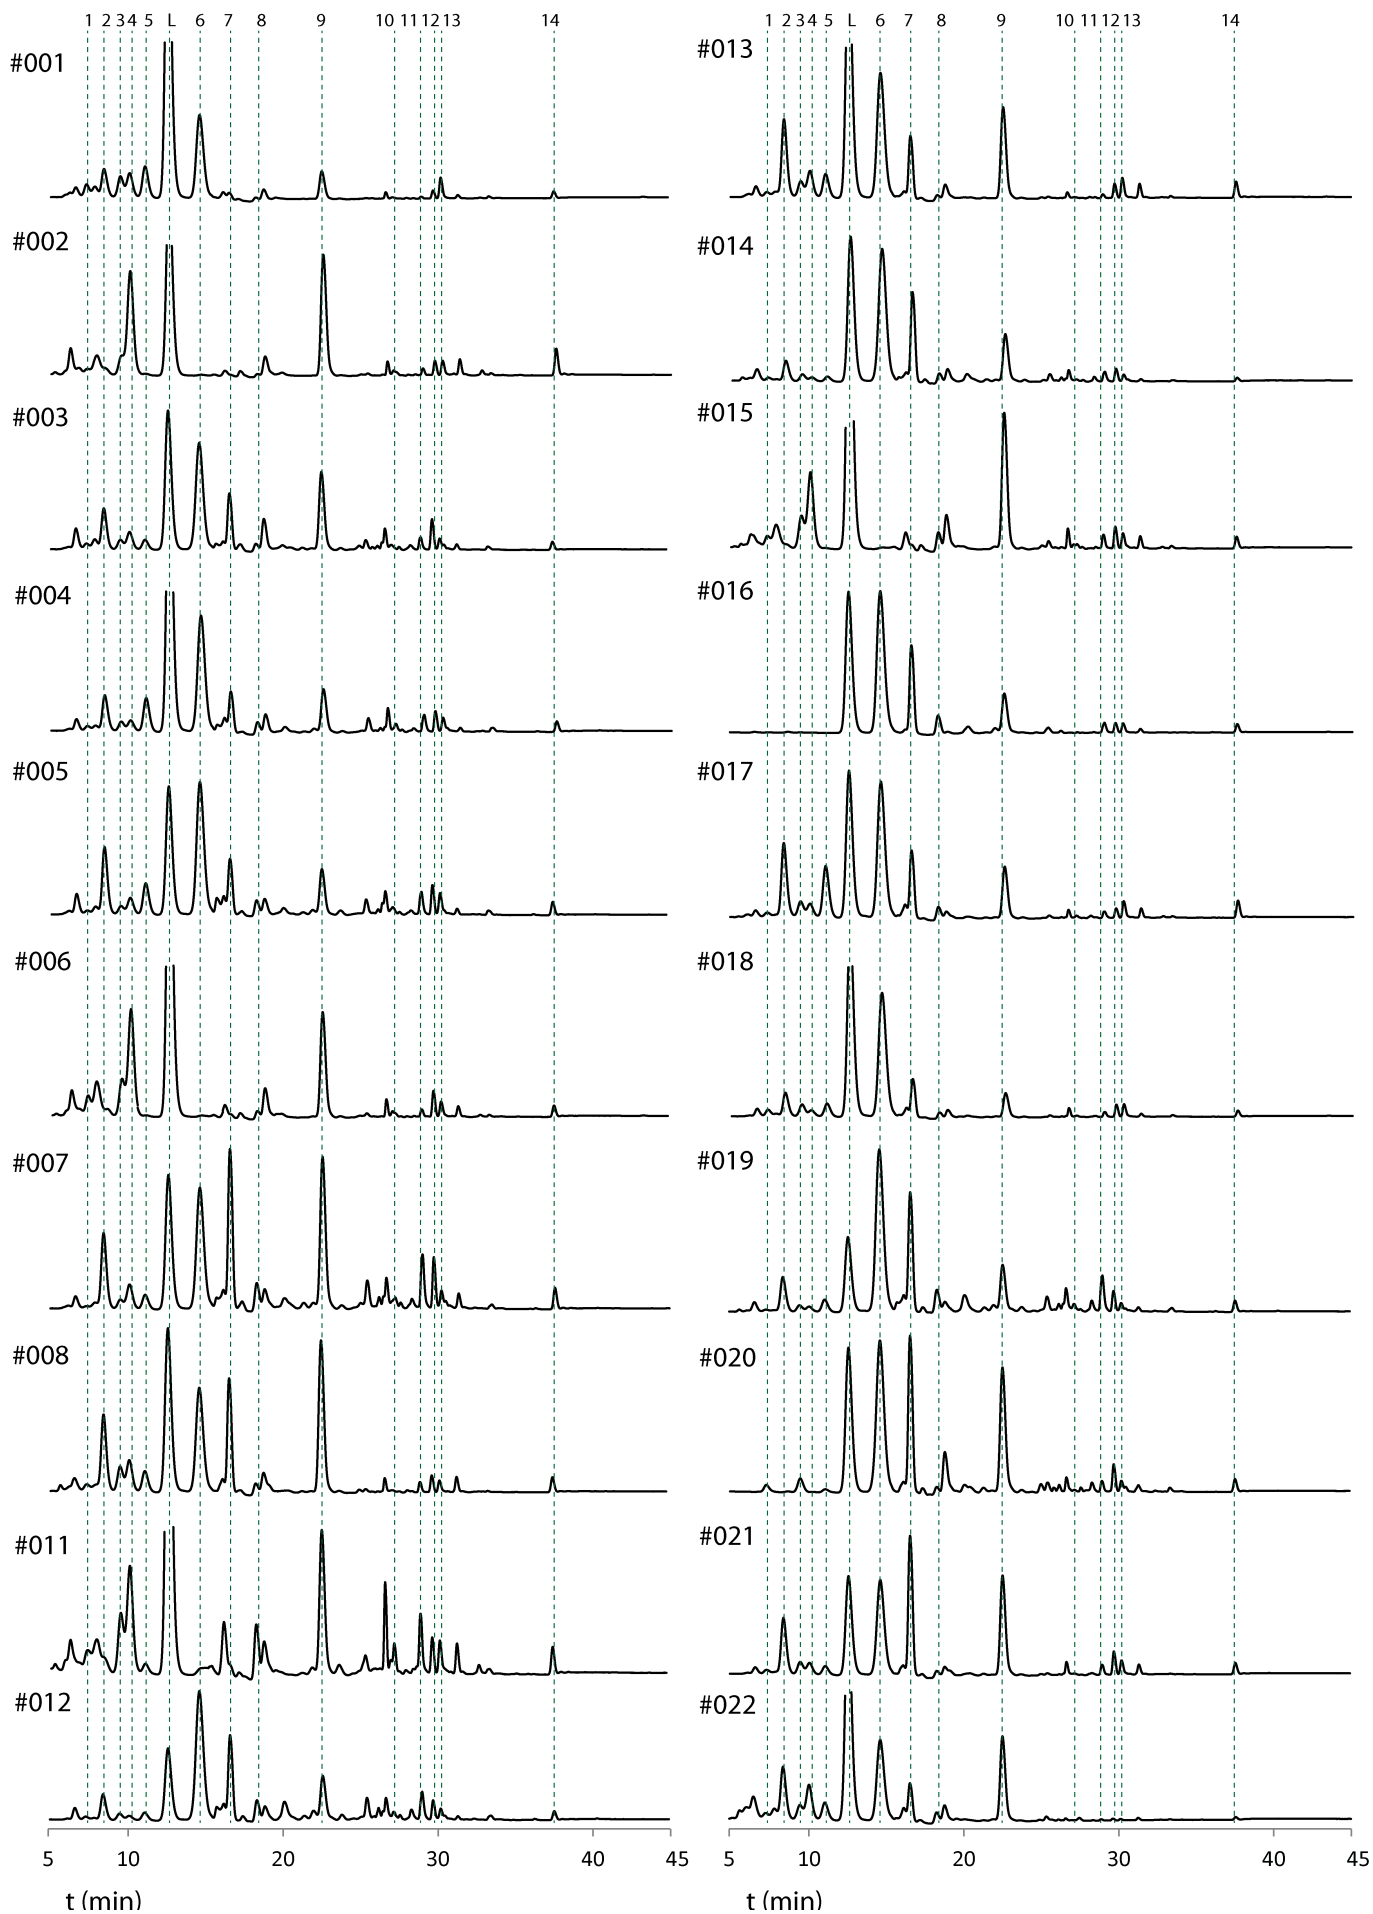

**Fig. S3.** HPAEC-PAD profiles of human milk oligosaccharides isolated from mothers' milk. Peaks for lactose (L) and reference structures 1-14 (Table 2, main paper) are indicated. Parts 1 – 5 show samples from 1. Ha Long Bay, 2. Phu Tho, 3. Tien Giang, 4. Ho Chi Minh, 5. Ha Noi (Fig. S1).



(Fig. S3 – part2)

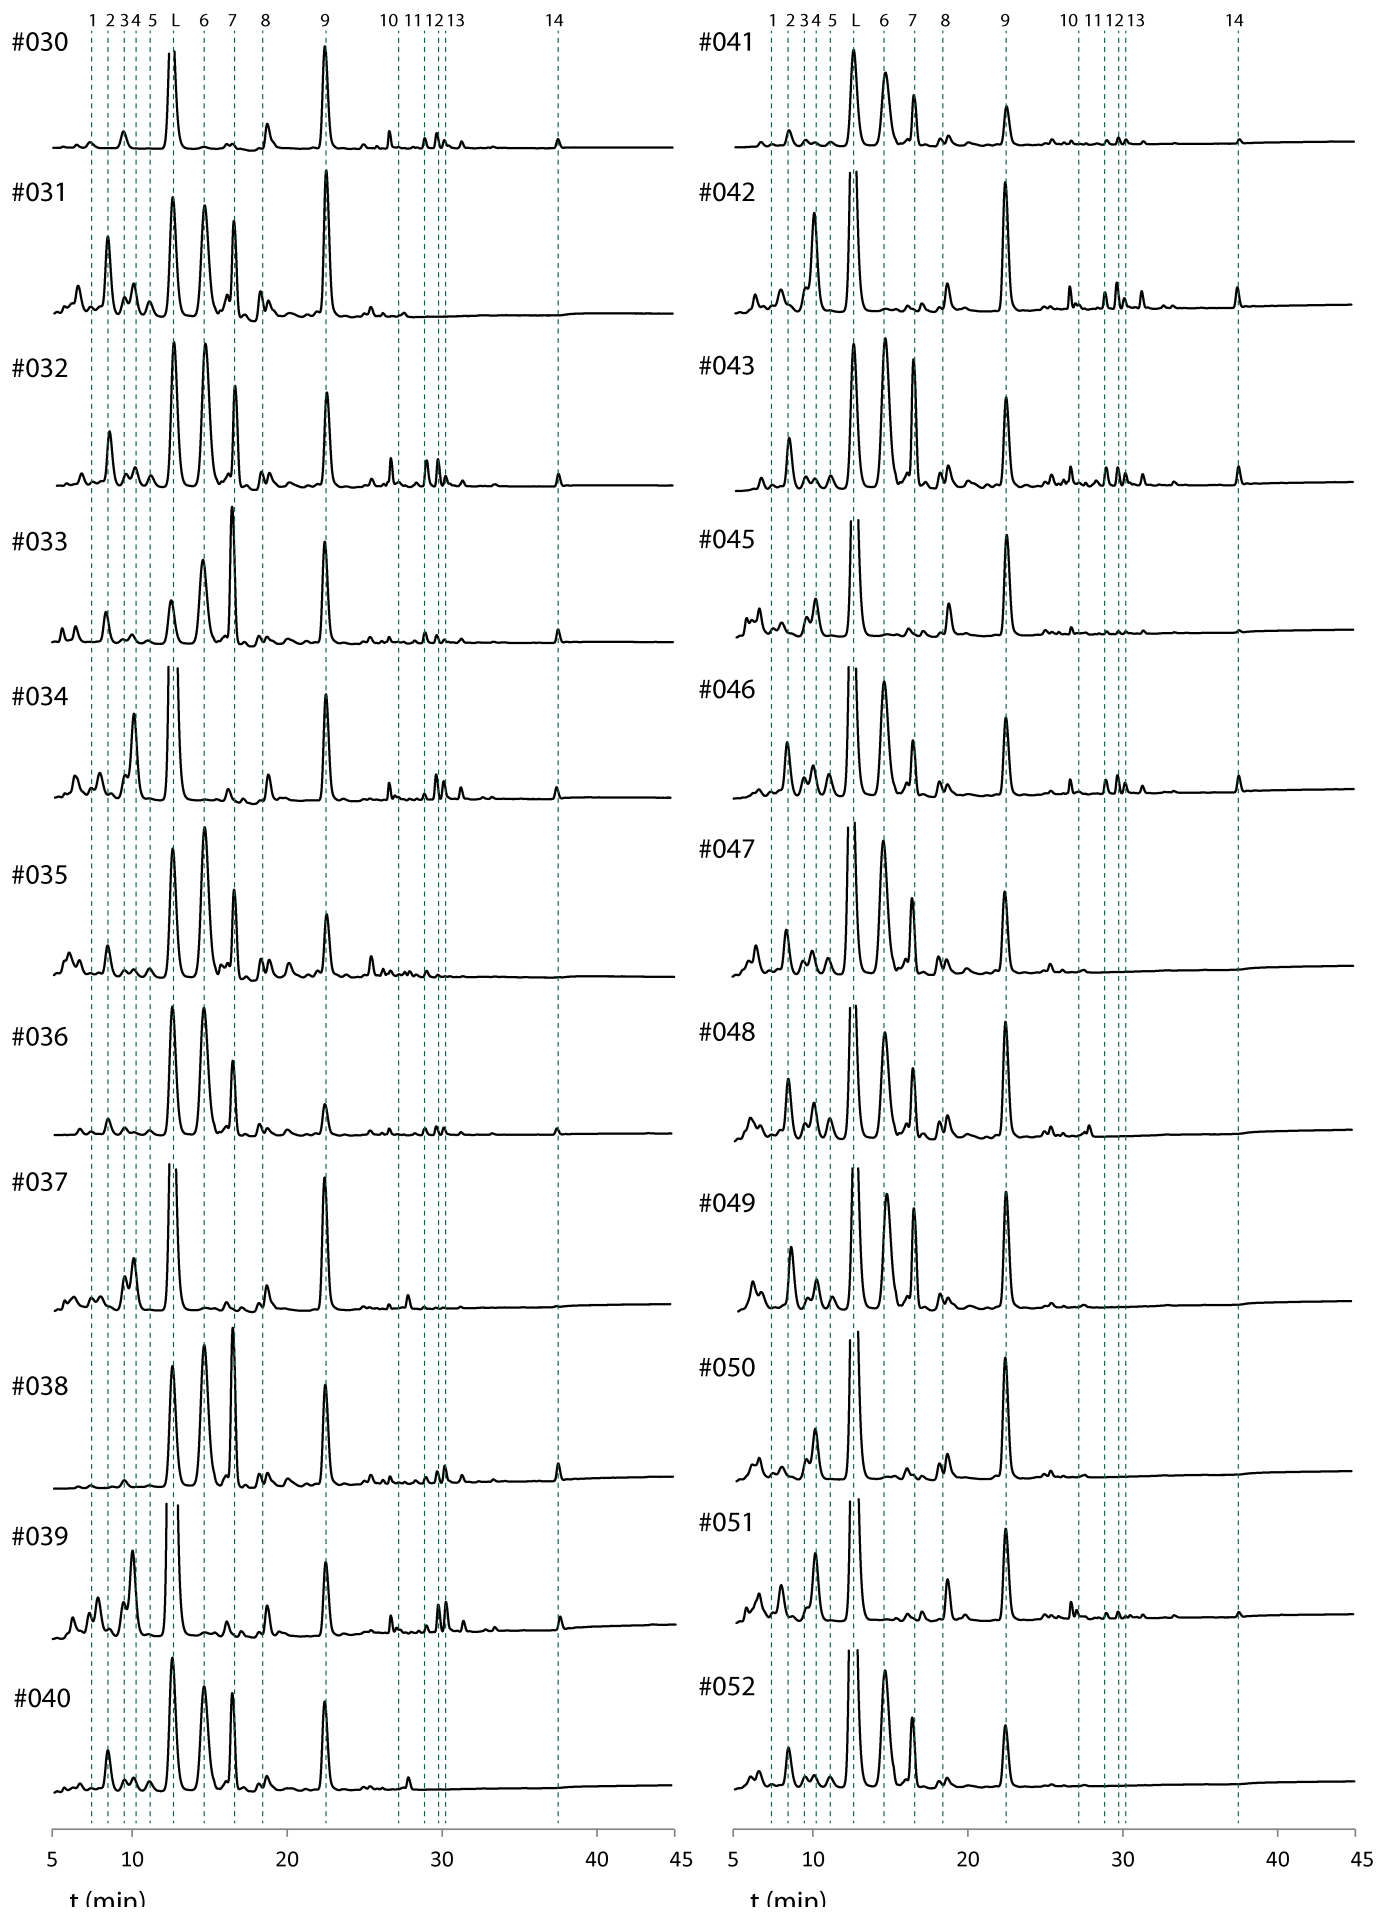

(Fig. S3 – part 3)

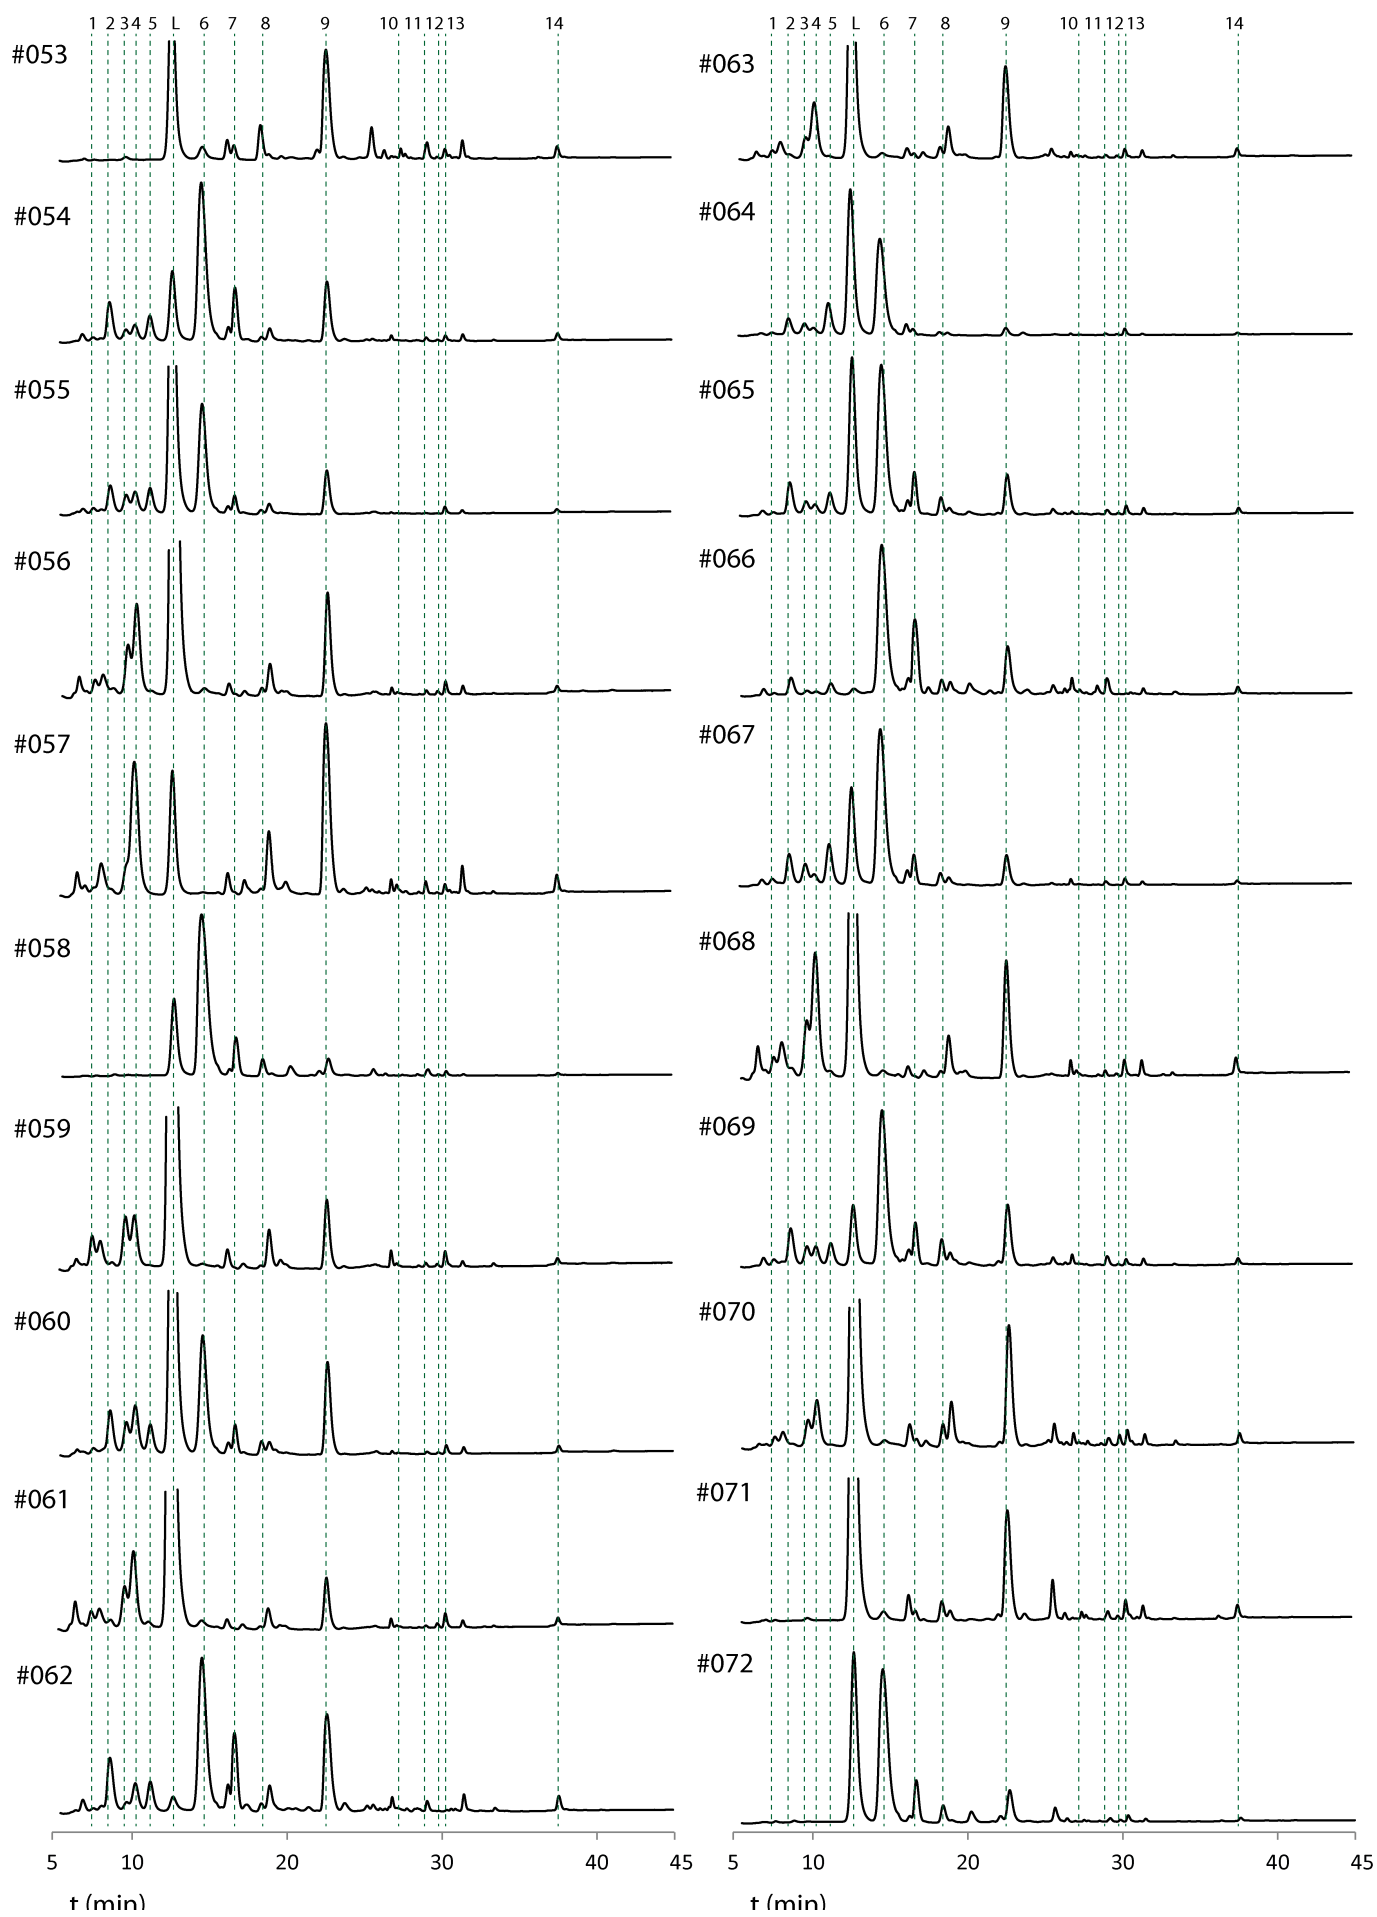

(Fig. S3 – part 4)

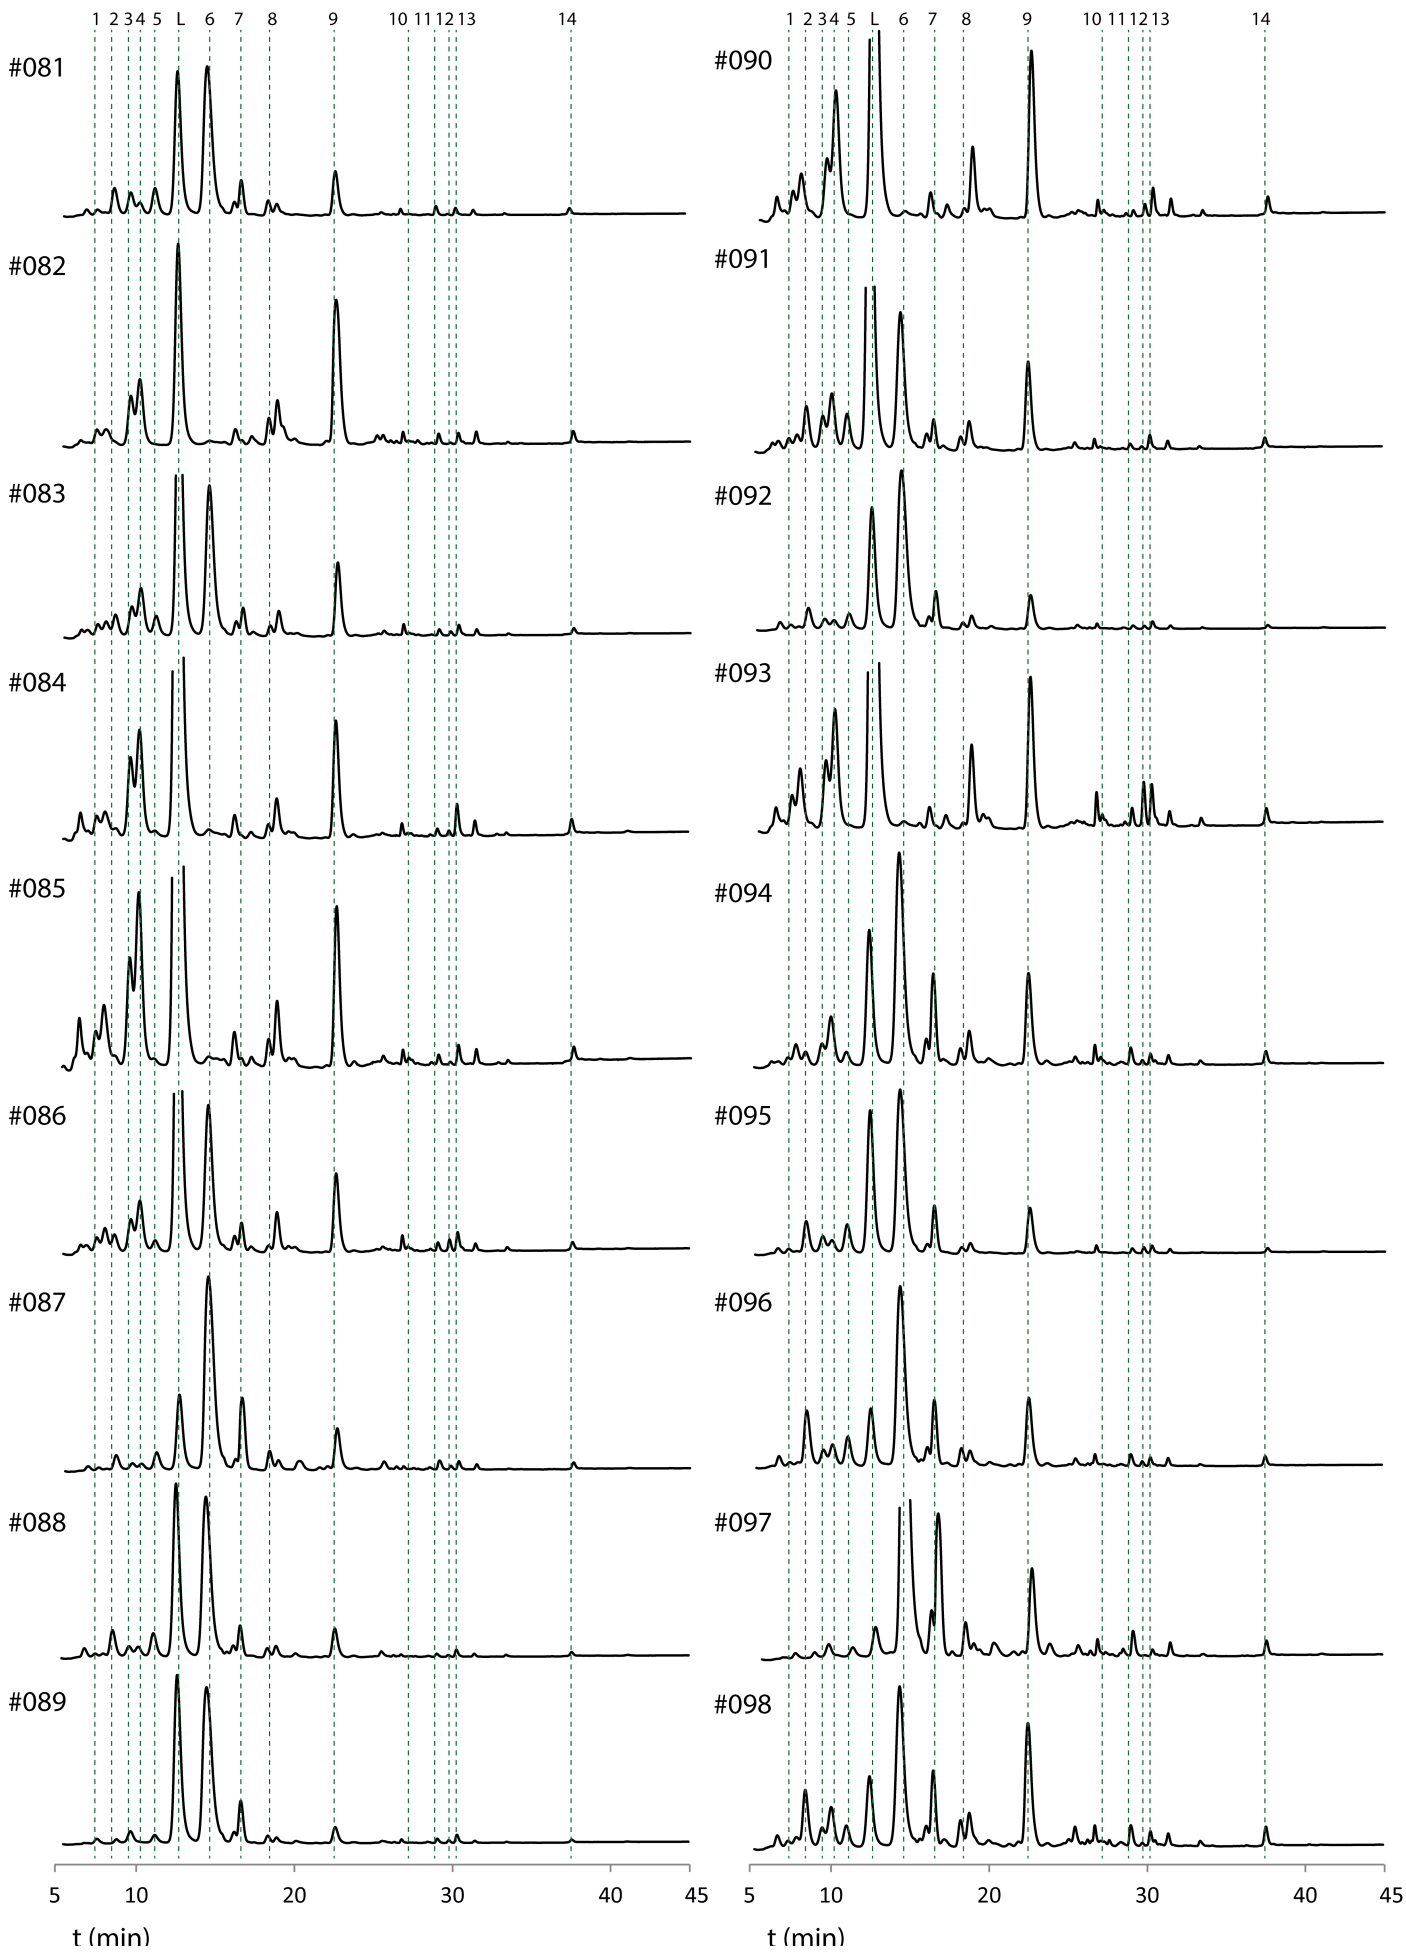

(Fig. S3 – part 5)

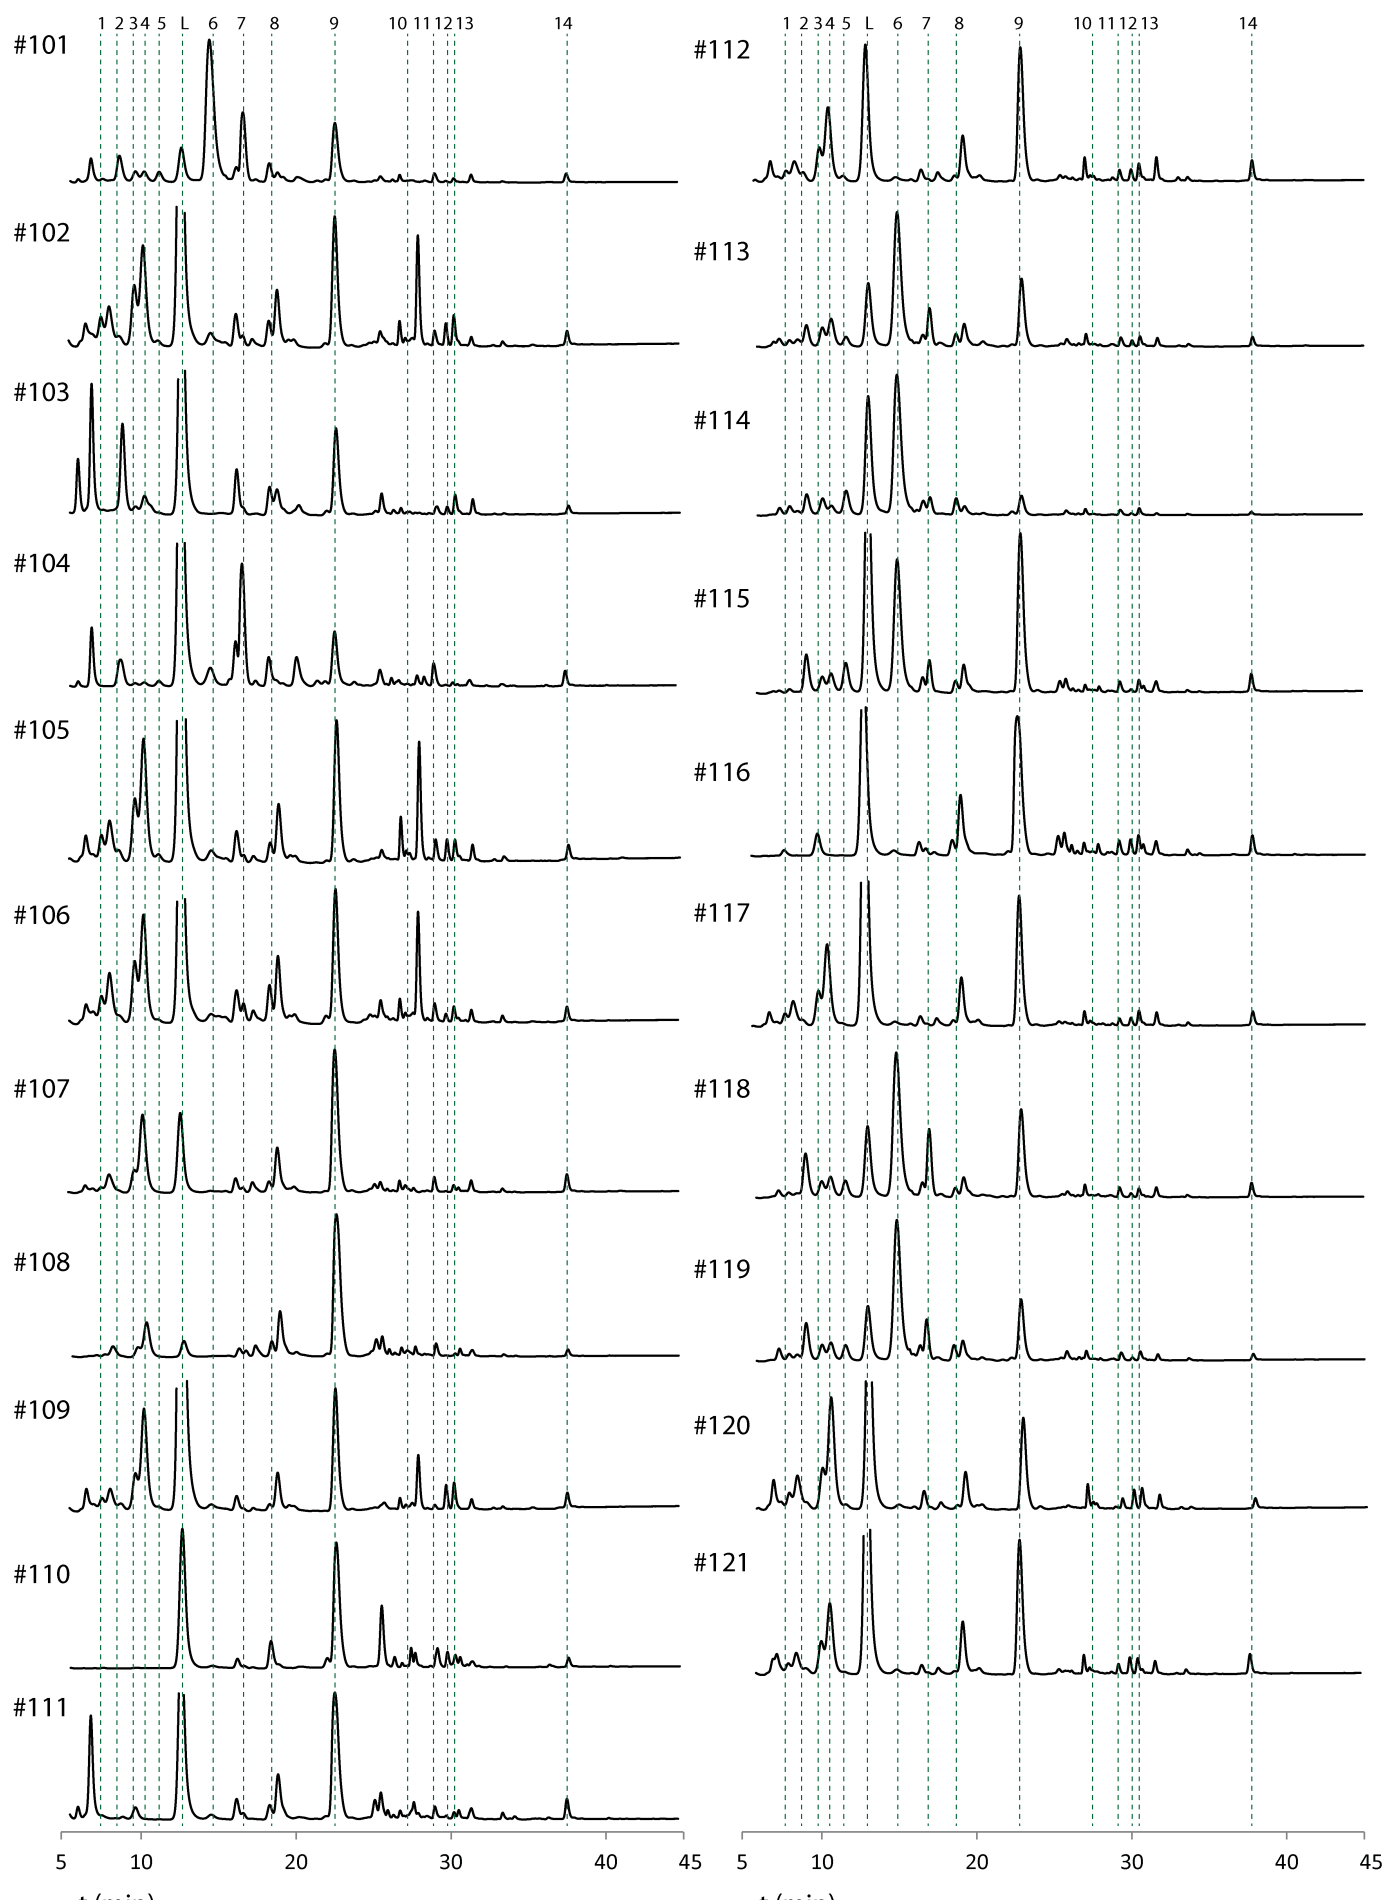

**Table S1.** Levels of Lewis and Secretor epitopes obtained by 1D <sup>1</sup>H NMR analysis of hMOS from mothers' milk and corresponding infant faeces. Secretor/Lewis ratio (S/L) is based on Fuc CH<sub>3</sub> region integrals for isolated from milk samples and milk group (MG) classification based on NMR spectra and confirmed by HPAEC-PAD analysis.

| M/F # | hMOS from milk  |                 |                 |                 |      |      | hMOS from faeces <sup>a</sup> |                 |                 |                 |      |      | S/L <sup>b</sup> | MG | CP <sup>c</sup> |
|-------|-----------------|-----------------|-----------------|-----------------|------|------|-------------------------------|-----------------|-----------------|-----------------|------|------|------------------|----|-----------------|
|       | Le <sup>a</sup> | Le <sup>b</sup> | Le <sup>x</sup> | Le <sup>y</sup> | 2'FL | H    | Le <sup>a</sup>               | Le <sup>b</sup> | Le <sup>x</sup> | Le <sup>y</sup> | 2'FL | H    |                  |    |                 |
| #001  | 0.12            | 0.10            | 0.32            | 0.10            | 0.34 | 0.02 | 0.04                          | 0.60            | 0.01            | 0.00            | 0.00 | 1.00 | 1.06             | 1b | S               |
| #002  | 0.57            | 0.00            | 0.43            | 0.00            | 0.00 | 0.00 | N/A                           | N/A             | N/A             | N/A             | N/A  | N/A  | 0.00             | 2  | Nd              |
| #003  | 0.07            | 0.14            | 0.34            | 0.03            | 0.30 | 0.12 | 0.53                          | 1.00            | 0.31            | 0.00            | 0.00 | 0.00 | 1.23             | 1b | S               |
| #004  | 0.05            | 0.12            | 0.32            | 0.10            | 0.32 | 0.09 | 1.00                          | 0.43            | 0.21            | 0.00            | 0.00 | 0.42 | 1.48             | 1b | S               |
| #005  | 0.06            | 0.18            | 0.30            | 0.07            | 0.30 | 0.09 | 1.00                          | 0.30            | 0.06            | 0.00            | 0.00 | 0.18 | 1.46             | 1b | S               |
| #006  | 0.46            | 0.00            | 0.54            | 0.00            | 0.00 | 0.00 | 1.00                          | N/A             | 0.89            | N/A             | N/A  | N/A  | 0.00             | 2  | NS              |
| #007  | 0.07            | 0.15            | 0.29            | 0.04            | 0.24 | 0.21 | nd                            | nd              | nd              | nd              | nd   | nd   | 1.52             | 1a | Nd              |
| #008  | 0.07            | 0.14            | 0.33            | 0.04            | 0.25 | 0.17 | 0.33                          | 1.00            | 0.02            | 0.00            | 0.00 | 0.36 | 1.28             | 1b | S               |
| #011  | 0.27            | 0.00            | 0.73            | 0.00            | 0.00 | 0.00 | 0.00                          | N/A             | 0.00            | N/A             | N/A  | N/A  | 0.00             | 2  | C               |
| #012  | 0.03            | 0.11            | 0.26            | 0.04            | 0.33 | 0.23 | 1.00                          | 0.67            | 0.29            | 0.08            | 0.00 | 0.65 | 1.89             | 1a | S               |
| #013  | 0.07            | 0.15            | 0.29            | 0.06            | 0.33 | 0.10 | 0.00                          | 0.00            | 0.00            | 0.00            | 0.00 | 0.00 | 1.55             | 1b | C               |
| #014  | 0.01            | 0.08            | 0.21            | 0.02            | 0.44 | 0.24 | 0.00                          | 0.00            | 0.00            | 0.00            | 0.00 | 0.00 | 2.44             | 1a | C               |
| #015  | 0.41            | 0.00            | 0.59            | 0.00            | 0.00 | 0.00 | 1.00                          | N/A             | 0.62            | N/A             | N/A  | N/A  | 0.00             | 2  | C               |
| #016  | 0.00            | 0.00            | 0.00            | 0.01            | 0.73 | 0.26 | N/A                           | N/A             | N/A             | 0.00            | 1.00 | 0.88 | 16.8             | 3b | NS              |
| #017  | 0.03            | 0.14            | 0.27            | 0.11            | 0.35 | 0.10 | nd                            | nd              | nd              | nd              | nd   | nd   | 1.74             | 1b | Nd              |
| #018  | 0.02            | 0.08            | 0.24            | 0.05            | 0.51 | 0.10 | 0.93                          | 0.83            | 0.00            | 0.00            | 0.00 | 1.00 | 2.11             | 1a | S               |
| #019  | 0.02            | 0.10            | 0.20            | 0.04            | 0.39 | 0.25 | 1.00                          | 0.93            | 0.27            | 0.09            | 0.00 | 0.05 | 2.50             | 1a | S               |
| #020  | 0.00            | 0.00            | 0.24            | 0.00            | 0.41 | 0.35 | N/A                           | N/A             | 0.00            | N/A             | 0.00 | 1.00 | 2.54             | 3a | S               |
| #021  | 0.03            | 0.13            | 0.28            | 0.03            | 0.27 | 0.26 | 1.00                          | 0.23            | 0.15            | 0.00            | 0.00 | 0.09 | 1.93             | 1a | S               |
| #022  | 0.14            | 0.14            | 0.32            | 0.05            | 0.28 | 0.07 | 0.00                          | 0.00            | 0.00            | 0.00            | 0.00 | 0.00 | 1.08             | 1b | S               |
| #030  | 0.00            | 0.00            | 0.97            | 0.00            | 0.00 | 0.03 | nd                            | nd              | nd              | nd              | nd   | nd   | 0.00             | 4a | Nd              |
| #031  | 0.10            | 0.16            | 0.33            | 0.03            | 0.24 | 0.14 | 1.00                          | 0.35            | 0.44            | 0.11            | 0.00 | 0.19 | 1.20             | 1b | S               |
| #032  | 0.06            | 0.12            | 0.28            | 0.02            | 0.35 | 0.17 | 0.78                          | 0.43            | 0.46            | 0.21            | 0.06 | 1.00 | 1.73             | 1a | NS              |
| #033  | 0.05            | 0.10            | 0.20            | 0.01            | 0.30 | 0.34 | nd                            | nd              | nd              | nd              | nd   | nd   | 2.40             | 1a | Nd              |
| #034  | 0.51            | 0.00            | 0.49            | 0.00            | 0.00 | 0.00 | 0.82                          | N/A             | 1.00            | N/A             | N/A  | N/A  | 0.00             | 2  | NS              |
| #035  | 0.06            | 0.11            | 0.26            | 0.02            | 0.38 | 0.17 | 0.00                          | 0.00            | 0.00            | 0.00            | 0.00 | 0.00 | 1.90             | 1a | C               |
| #036  | 0.01            | 0.07            | 0.19            | 0.03            | 0.48 | 0.22 | 1.00                          | 0.15            | 0.09            | 0.10            | 0.01 | 0.13 | 2.82             | 1a | S               |
| #037  | 0.32            | 0.00            | 0.67            | 0.00            | 0.01 | 0.00 | 1.00                          | N/A             | 0.61            | N/A             | 0.00 | N/A  | 0.00             | 2  | S               |
| #038  | 0.00            | 0.00            | 0.14            | 0.00            | 0.48 | 0.38 | N/A                           | N/A             | 1.00            | N/A             | 0.00 | 0.45 | 6.90             | 3a | S               |
| #039  | 0.39            | 0.00            | 0.61            | 0.00            | 0.00 | 0.00 | 1.00                          | N/A             | 1.00            | N/A             | N/A  | N/A  | 0.00             | 2  | NS              |
| #040  | 0.04            | 0.12            | 0.27            | 0.03            | 0.32 | 0.22 | 1.00                          | 0.41            | 0.02            | 0.53            | 0.00 | 0.21 | 1.62             | 1a | S               |
| #041  | 0.01            | 0.10            | 0.26            | 0.03            | 0.38 | 0.22 | 1.00                          | 0.08            | 0.14            | 0.00            | 0.00 | 0.04 | 2.05             | 1a | C               |
| #042  | 0.52            | 0.00            | 0.48            | 0.00            | 0.00 | 0.00 | nd                            | nd              | nd              | nd              | nd   | nd   | 0.00             | 2  | Nd              |
| #043  | 0.03            | 0.12            | 0.29            | 0.03            | 0.32 | 0.21 | nd                            | nd              | nd              | nd              | nd   | nd   | 1.80             | 1a | Nd              |
| #045  | 0.31            | 0.00            | 0.68            | 0.00            | 0.01 | 0.00 | 0.00                          | N/A             | 0.00            | N/A             | 0.00 | N/A  | 0.00             | 2  | C               |
| #046  | 0.09            | 0.14            | 0.28            | 0.05            | 0.33 | 0.11 | 0.00                          | 0.00            | 0.00            | 0.00            | 0.00 | 0.00 | 1.30             | 1a | C               |
| #047  | 0.07            | 0.12            | 0.25            | 0.04            | 0.37 | 0.15 | nd                            | nd              | nd              | nd              | nd   | nd   | 1.57             | 1a | Nd              |
| #048  | 0.09            | 0.14            | 0.34            | 0.05            | 0.25 | 0.13 | nd                            | nd              | nd              | nd              | nd   | nd   | 1.07             | 1b | Nd              |
| #049  | 0.10            | 0.13            | 0.28            | 0.02            | 0.32 | 0.15 | 1.00                          | 0.71            | 0.99            | 0.77            | 0.36 | 1.18 | 1.57             | 1a | NS              |
| #050  | 0.40            | 0.00            | 0.60            | 0.00            | 0.00 | 0.00 | 1.00                          | N/A             | 0.96            | N/A             | N/A  | N/A  | 0.00             | 2  | NS              |
| #051  | 0.48            | 0.00            | 0.52            | 0.00            | 0.00 | 0.00 | 0.85                          | N/A             | 1.00            | N/A             | N/A  | N/A  | 0.00             | 2  | NS              |
| #052  | 0.03            | 0.11            | 0.26            | 0.04            | 0.39 | 0.17 | 0.67                          | 0.36            | 0.10            | 0.17            | 0.17 | 1.00 | 2.01             | 1a | S               |
| #053  | 0.00            | 0.00            | 0.17            | 0.00            | 0.41 | 0.42 | N/A                           | N/A             | 0.00            | N/A             | 0.00 | 0.00 | 1.65             | 4a | C               |
| #054  | 0.05            | 0.13            | 0.25            | 0.04            | 0.39 | 0.14 | 0.51                          | 0.18            | 0.25            | 1.00            | 0.34 | 0.00 | 2.04             | 1a | NS              |
| #055  | 0.11            | 0.13            | 0.25            | 0.07            | 0.38 | 0.06 | 0.40                          | 0.21            | 0.28            | 0.10            | 0.02 | 1.00 | 1.38             | 1a | S               |
| #056  | 0.49            | 0.00            | 0.51            | 0.00            | 0.00 | 0.00 | 0.00                          | N/A             | 0.00            | N/A             | N/A  | N/A  | 0.01             | 2  | C               |
| #057  | 0.65            | 0.00            | 0.35            | 0.00            | 0.00 | 0.00 | 0.36                          | N/A             | 1.00            | N/A             | N/A  | N/A  | 0.01             | 2  | S               |
| #058  | 0.00            | 0.00            | 0.00            | 0.00            | 0.84 | 0.16 | nd                            | nd              | nd              | nd              | nd   | nd   | 34.3             | 3b | Nd              |
| #059  | 0.31            | 0.00            | 0.69            | 0.00            | 0.00 | 0.00 | 0.00                          | N/A             | 0.00            | N/A             | N/A  | N/A  | 0.00             | 2  | C               |
| #060  | 0.16            | 0.14            | 0.31            | 0.05            | 0.29 | 0.05 | 1.00                          | 0.82            | 0.76            | 0.69            | 0.02 | 0.57 | 1.02             | 1b | S               |
| #061  | 0.47            | 0.00            | 0.53            | 0.00            | 0.00 | 0.00 | nd                            | nd              | nd              | nd              | nd   | nd   | 0.01             | 2  | Nd              |
| #062  | 0.07            | 0.16            | 0.30            | 0.03            | 0.25 | 0.19 | nd                            | nd              | nd              | nd              | nd   | nd   | 1.50             | 1b | Nd              |
| #063  | 0.53            | 0.00            | 0.47            | 0.00            | 0.00 | 0.00 | 1.00                          | N/A             | 0.96            | N/A             | N/A  | N/A  | 0.01             | 2  | S               |
| #064  | 0.03            | 0.10            | 0.18            | 0.13            | 0.55 | 0.01 | 1.00                          | 0.12            | 0.10            | 0.00            | 0.00 | 0.00 | 2.41             | 1a | S               |
| #065  | 0.03            | 0.12            | 0.22            | 0.04            | 0.48 | 0.11 | 0.79                          | 0.43            | 0.12            | 0.11            | 0.00 | 1.00 | 2.61             | 1a | S               |
| #066  | 0.02            | 0.07            | 0.22            | 0.03            | 0.32 | 0.34 | nd                            | nd              | nd              | nd              | nd   | nd   | 2.74             | 1a | Nd              |
| #067  | 0.03            | 0.11            | 0.26            | 0.07            | 0.47 | 0.06 | 0.85                          | 1.00            | 0.01            | 0.00            | 0.00 | 0.51 | 2.11             | 1a | S               |
| #068  | 0.47            | 0.00            | 0.53            | 0.00            | 0.00 | 0.00 | 0.00                          | N/A             | 0.00            | N/A             | N/A  | N/A  | 0.03             | 2  | C               |
| #069  | 0.05            | 0.14            | 0.30            | 0.03            | 0.38 | 0.10 | 1.00                          | 0.28            | 0.27            | 0.23            | 0.00 | 0.50 | 1.57             | 1a | NS              |
| #070  | 0.38            | 0.00            | 0.62            | 0.00            | 0.00 | 0.00 | N/A                           | N/A             | N/A             | N/A             | N/A  | N/A  | 0.00             | 2  | Nd              |
| #071  | 0.00            | 0.00            | 0.38            | 0.00            | 0.38 | 0.24 | nd                            | nd              | nd              | nd              | nd   | nd   | 1.43             | 4a | Nd              |
| #072  | 0.00            | 0.00            | 0.00            | 0.00            | 0.81 | 0.19 | N/A                           | N/A             | N/A             | N/A             | 0.06 | 1.00 | 192              | 3b | S               |

**(Table S1 continued)**

|      | hMOS from milk  |                 |                 |                 |      |      | hMOS from faeces |                 |                 |                 |      |      | S/L  | MG | CP |
|------|-----------------|-----------------|-----------------|-----------------|------|------|------------------|-----------------|-----------------|-----------------|------|------|------|----|----|
|      | Le <sup>a</sup> | Le <sup>b</sup> | Le <sup>x</sup> | Le <sup>y</sup> | 2'FL | H    | Le <sup>a</sup>  | Le <sup>b</sup> | Le <sup>x</sup> | Le <sup>y</sup> | 2'FL | H    |      |    |    |
| #081 | 0.04            | 0.10            | 0.29            | 0.04            | 0.45 | 0.08 | 1.00             | 0.33            | 0.39            | 0.25            | 0.14 | 0.92 | 1.81 | 1a | NS |
| #082 | 0.33            | 0.00            | 0.67            | 0.00            | 0.00 | 0.00 | 0.00             | N/A             | 0.00            | N/A             | N/A  | N/A  | 0.01 | 2  | C  |
| #083 | 0.15            | 0.08            | 0.31            | 0.04            | 0.34 | 0.08 | 0.00             | 0.00            | 0.00            | 0.00            | 0.00 | 0.00 | 0.95 | 1a | C  |
| #084 | 0.37            | 0.00            | 0.63            | 0.00            | 0.00 | 0.00 | 1.00             | N/A             | 0.88            | N/A             | N/A  | N/A  | 0.02 | 2  | NS |
| #085 | 0.42            | 0.00            | 0.58            | 0.00            | 0.00 | 0.00 | 0.71             | N/A             | 1.00            | N/A             | N/A  | N/A  | 0.01 | 2  | NS |
| #086 | 0.19            | 0.05            | 0.34            | 0.03            | 0.29 | 0.10 | 0.00             | 0.00            | 0.50            | 1.00            | 0.00 | 0.00 | 0.72 | 1a | C  |
| #087 | 0.02            | 0.11            | 0.20            | 0.07            | 0.49 | 0.11 | 1.00             | 0.00            | 0.00            | 0.29            | 0.00 | 0.00 | 2.57 | 1a | C  |
| #088 | 0.00            | 0.00            | 0.10            | 0.04            | 0.68 | 0.18 | N/A              | N/A             | 0.14            | 0.00            | 0.00 | 1.00 | 4.65 | 3a | S  |
| #089 | 0.17            | 0.11            | 0.33            | 0.05            | 0.27 | 0.07 | 0.67             | 1.00            | 0.23            | 0.00            | 0.00 | 0.43 | 0.81 | 1b | S  |
| #090 | 0.45            | 0.00            | 0.55            | 0.00            | 0.00 | 0.00 | 0.96             | N/A             | 1.00            | N/A             | N/A  | N/A  | 0.01 | 2  | NS |
| #091 | 0.04            | 0.07            | 0.21            | 0.02            | 0.56 | 0.10 | 1.00             | 0.00            | 0.30            | 0.00            | 0.00 | 0.00 | 2.78 | 1a | S  |
| #092 | 0.03            | 0.02            | 0.09            | 0.01            | 0.63 | 0.22 | 0.00             | 0.00            | 0.00            | 0.00            | 0.00 | 0.00 | 6.32 | 1a | C  |
| #093 | 0.36            | 0.00            | 0.64            | 0.00            | 0.00 | 0.00 | nd               | nd              | nd              | nd              | nd   | nd   | 0.00 | 2  | Nd |
| #094 | 0.16            | 0.02            | 0.22            | 0.01            | 0.42 | 0.17 | 1.00             | 0.00            | 0.73            | 0.00            | 0.00 | 0.12 | 1.49 | 1a | S  |
| #095 | 0.04            | 0.09            | 0.22            | 0.05            | 0.49 | 0.11 | 1.00             | 0.59            | 0.00            | 0.00            | 0.00 | 0.00 | 2.38 | 1a | S  |
| #096 | 0.05            | 0.15            | 0.27            | 0.03            | 0.37 | 0.13 | 0.00             | 0.00            | 0.15            | 0.12            | 0.00 | 1.00 | 1.87 | 1a | S  |
| #097 | 0.00            | 0.00            | 0.10            | 0.01            | 0.57 | 0.32 | N/A              | N/A             | 0.30            | 0.51            | 0.28 | 1.00 | 6.57 | 3a | NS |
| #098 | 0.11            | 0.14            | 0.36            | 0.02            | 0.24 | 0.13 | nd               | nd              | nd              | nd              | nd   | nd   | 1.10 | 1b | Nd |
| #101 | 0.04            | 0.08            | 0.20            | 0.02            | 0.41 | 0.25 | 1.00             | 0.38            | 0.47            | 0.50            | 0.02 | 0.60 | 2.75 | 1a | S  |
| #102 | 0.39            | 0.00            | 0.59            | 0.00            | 0.02 | 0.00 | nd               | nd              | nd              | nd              | nd   | nd   | 0.07 | 2  | Nd |
| #103 | 0.57            | 0.00            | 0.43            | 0.00            | 0.00 | 0.00 | 1.00             | N/A             | 1.33            | N/A             | N/A  | N/A  | 0.03 | 2  | S  |
| #104 | 0.01            | 0.05            | 0.13            | 0.02            | 0.40 | 0.39 | 0.00             | 1.00            | 0.50            | 0.00            | 0.04 | 0.95 | 5.00 | 1a | S  |
| #105 | 0.39            | 0.00            | 0.61            | 0.00            | 0.00 | 0.00 | 1.00             | N/A             | 0.72            | N/A             | N/A  | N/A  | 0.09 | 2  | NS |
| #106 | 0.41            | 0.00            | 0.58            | 0.00            | 0.01 | 0.00 | nd               | nd              | nd              | nd              | nd   | nd   | 0.03 | 2  | Nd |
| #107 | 0.52            | 0.00            | 0.48            | 0.00            | 0.00 | 0.00 | 0.96             | N/A             | 1.00            | N/A             | N/A  | N/A  | 0.02 | 2  | NS |
| #108 | 0.39            | 0.00            | 0.61            | 0.00            | 0.00 | 0.00 | 1.00             | N/A             | 0.96            | N/A             | N/A  | N/A  | 0.02 | 2  | NS |
| #109 | 0.50            | 0.00            | 0.50            | 0.00            | 0.00 | 0.00 | nd               | nd              | nd              | nd              | nd   | nd   | 0.02 | 2  | Nd |
| #110 | 0.00            | 0.00            | 0.00            | 0.00            | 0.00 | 0.00 | nd               | nd              | nd              | nd              | nd   | nd   | 1.00 | 4b | Nd |
| #111 | 0.00            | 0.00            | 0.99            | 0.00            | 0.01 | 0.00 | N/A              | N/A             | 1.00            | N/A             | 0.00 | N/A  | 0.08 | 4a | NS |
| #112 | 0.38            | 0.00            | 0.62            | 0.00            | 0.00 | 0.00 | 0.00             | N/A             | 0.00            | N/A             | N/A  | N/A  | 0.05 | 2  | C  |
| #113 | 0.10            | 0.08            | 0.32            | 0.02            | 0.36 | 0.12 | nd               | nd              | nd              | nd              | nd   | nd   | 1.21 | 1a | Nd |
| #114 | 0.03            | 0.10            | 0.29            | 0.06            | 0.47 | 0.05 | 0.00             | 0.00            | 0.00            | 0.00            | 0.00 | 1.00 | 1.75 | 1a | S  |
| #115 | 0.08            | 0.10            | 0.29            | 0.07            | 0.41 | 0.05 | 1.00             | 0.00            | 0.23            | 0.00            | 0.00 | 0.00 | 1.55 | 1a | S  |
| #116 | 0.00            | 0.00            | 0.99            | 0.00            | 0.00 | 0.01 | N/A              | N/A             | 0.00            | N/A             | N/A  | 0.00 | 0.00 | 4a | C  |
| #117 | 0.50            | 0.00            | 0.50            | 0.00            | 0.00 | 0.00 | 0.79             | N/A             | 1.00            | N/A             | N/A  | N/A  | 0.02 | 2  | NS |
| #118 | 0.07            | 0.11            | 0.28            | 0.02            | 0.37 | 0.15 | nd               | nd              | nd              | nd              | nd   | nd   | 1.69 | 1a | Nd |
| #119 | 0.06            | 0.13            | 0.33            | 0.03            | 0.35 | 0.10 | 0.00             | 0.00            | 0.00            | 0.00            | 0.00 | 0.00 | 1.38 | 1a | C  |
| #120 | 0.48            | 0.00            | 0.51            | 0.00            | 0.01 | 0.00 | nd               | nd              | nd              | nd              | nd   | nd   | 0.01 | 2  | Nd |
| #121 | 0.45            | 0.00            | 0.54            | 0.00            | 0.01 | 0.00 | nd               | nd              | nd              | nd              | nd   | nd   | 0.03 | 2  | Nd |

<sup>a</sup>. Faecal data are expressed in ratio relative to the highest remaining epitope compared to milk epitopes; 1.00 indicated the highest intensity peak., nd indicates that no faecal sample was available, N/A indicated the structural epitope was already not present in the milk.

<sup>b</sup>. Se (Secretory activity) levels are derived from the integral  $\delta$  1.19-1.24 adding  $\frac{1}{2}$  of the integral  $\delta$  1.24-1.30; the Le (Lewis activity) levels are similarly derived from the integral  $\delta$  1.14-1.19 adding  $\frac{1}{2}$  of the integral  $\delta$  1.24-1.30.

<sup>c</sup>. Consumption patterns are derived from the difference between hMOS found in the milk and in the faeces. C indicated complete consumption of all hMOS, S signifies consumption of one or more specific epitopes, while other epitopes remain in the faeces. NS indicates samples where all structural elements found in the milk hMOS are still observed in the hMOS isolated from the faeces. For sample sets lacking a faecal sample nd is used.

**Table S2.** Food intake questionnaire at week 1 and week 4 of age. BM – breastmilk, FF – Formula, LQ – other liquids, water, juice, milk etc. and SF – solid foods. “Y” = yes, “N” = no and “-” = no data

| M/F# | Week 1 |    | Week 4 |    |    |    |
|------|--------|----|--------|----|----|----|
|      | BM     | FF | BM     | FF | LQ | SF |
| #001 | Y      | N  | Y      | N  | N  | Y  |
| #002 | Y      | N  | Y      | N  | N  | N  |
| #003 | Y      | N  | Y      | Y  | Y  | N  |
| #004 | -      | -  | -      | -  | -  | -  |
| #005 | Y      | N  | Y      | N  | N  | N  |
| #006 | Y      | N  | Y      | N  | N  | Y  |
| #007 | Y      | Y  | Y      | Y  | N  | N  |
| #008 | Y      | N  | Y      | N  | N  | N  |
| #011 | Y      | N  | Y      | Y  | N  | N  |
| #012 | Y      | N  | Y      | Y  | N  | N  |
| #013 | Y      | N  | Y      | N  | N  | N  |
| #014 | Y      | N  | Y      | Y  | N  | N  |
| #015 | Y      | N  | Y      | N  | N  | N  |
| #016 | -      | -  | -      | -  | -  | -  |
| #017 | Y      | N  | Y      | N  | N  | N  |
| #018 | Y      | Y  | Y      | N  | N  | N  |
| #019 | Y      | N  | Y      | N  | N  | N  |
| #020 | Y      | N  | Y      | N  | N  | N  |
| #021 | Y      | N  | Y      | N  | N  | N  |
| #022 | Y      | N  | Y      | N  | N  | N  |
| #030 | Y      | N  | Y      | N  | N  | N  |
| #031 | Y      | N  | Y      | Y  | N  | N  |
| #032 | Y      | N  | Y      | Y  | N  | N  |
| #033 | Y      | N  | Y      | N  | N  | N  |
| #034 | Y      | N  | Y      | N  | N  | N  |
| #035 | Y      | N  | Y      | N  | N  | N  |
| #036 | Y      | N  | Y      | N  | N  | N  |
| #037 | Y      | N  | Y      | N  | Y  | N  |
| #038 | Y      | N  | Y      | N  | Y  | N  |
| #039 | Y      | N  | Y      | N  | N  | N  |
| #040 | Y      | N  | Y      | N  | N  | N  |
| #041 | Y      | N  | Y      | Y  | N  | N  |
| #042 | Y      | N  | Y      | N  | N  | N  |
| #043 | Y      | N  | Y      | N  | N  | N  |
| #045 | -      | -  | -      | -  | -  | -  |
| #046 | Y      | N  | Y      | N  | N  | N  |
| #047 | Y      | N  | Y      | N  | N  | N  |
| #048 | Y      | N  | Y      | N  | N  | N  |
| #049 | Y      | N  | Y      | N  | N  | N  |
| #050 | -      | -  | -      | -  | -  | -  |
| #051 | Y      | N  | Y      | N  | N  | N  |
| #052 | Y      | N  | Y      | N  | N  | N  |
| #053 | Y      | N  | Y      | N  | N  | N  |
| #054 | Y      | N  | Y      | N  | N  | N  |
| #055 | Y      | N  | Y      | N  | N  | N  |
| #056 | Y      | N  | Y      | N  | N  | N  |
| #057 | Y      | N  | Y      | N  | N  | N  |
| #058 | Y      | N  | Y      | N  | N  | N  |
| #059 | Y      | N  | Y      | N  | N  | N  |
| #060 | Y      | N  | Y      | N  | N  | N  |
| #061 | Y      | N  | Y      | N  | N  | N  |
| #062 | Y      | N  | Y      | N  | N  | N  |
| #063 | Y      | N  | Y      | N  | N  | N  |
| #064 | Y      | N  | Y      | N  | N  | N  |
| #065 | Y      | N  | Y      | N  | N  | N  |
| #066 | Y      | N  | Y      | N  | N  | N  |
| #067 | Y      | N  | Y      | Y  | N  | N  |
| #068 | Y      | N  | Y      | N  | N  | N  |
| #069 | Y      | N  | Y      | N  | N  | N  |
| #070 | Y      | N  | Y      | N  | N  | N  |
| #071 | Y      | N  | Y      | N  | N  | N  |
| #072 | Y      | N  | Y      | N  | N  | N  |

(Table S2. Continued)

| M/F# | Week 1 |    | Week 4 |    |    |    |
|------|--------|----|--------|----|----|----|
|      | BM     | FF | BM     | FF | LQ | SF |
| #081 | Y      | N  | Y      | Y  | N  | N  |
| #082 | Y      | N  | Y      | N  | N  | N  |
| #083 | Y      | N  | Y      | Y  | N  | N  |
| #084 | Y      | Y  | Y      | N  | N  | N  |
| #085 | Y      | N  | Y      | N  | N  | N  |
| #086 | Y      | Y  | Y      | Y  | N  | N  |
| #087 | Y      | N  | Y      | N  | N  | N  |
| #088 | Y      | N  | Y      | Y  | N  | N  |
| #089 | Y      | N  | Y      | N  | N  | N  |
| #090 | Y      | N  | Y      | N  | N  | N  |
| #091 | Y      | N  | Y      | N  | N  | N  |
| #092 | -      | -  | -      | -  | -  | -  |
| #093 | Y      | N  | Y      | N  | N  | N  |
| #094 | Y      | N  | Y      | N  | N  | N  |
| #095 | Y      | N  | Y      | N  | N  | N  |
| #096 | Y      | N  | Y      | N  | N  | N  |
| #097 | Y      | N  | Y      | N  | N  | N  |
| #098 | Y      | N  | Y      | Y  | N  | N  |
| #101 | Y      | N  | Y      | N  | N  | N  |
| #102 | Y      | N  | Y      | N  | N  | N  |
| #103 | Y      | N  | Y      | N  | N  | N  |
| #104 | Y      | N  | Y      | N  | N  | N  |
| #105 | Y      | N  | Y      | N  | N  | N  |
| #106 | -      | -  | -      | -  | -  | -  |
| #107 | Y      | N  | Y      | N  | N  | N  |
| #108 | Y      | N  | Y      | Y  | N  | N  |
| #109 | Y      | N  | Y      | N  | N  | N  |
| #110 | -      | -  | -      | -  | -  | -  |
| #111 | Y      | Y  | Y      | Y  | N  | N  |
| #112 | Y      | Y  | Y      | Y  | N  | N  |
| #113 | Y      | N  | Y      | N  | N  | N  |
| #114 | Y      | N  | Y      | N  | N  | N  |
| #115 | Y      | N  | Y      | N  | N  | N  |
| #116 | Y      | N  | Y      | N  | N  | N  |
| #117 | -      | -  | -      | -  | -  | -  |
| #118 | Y      | N  | Y      | N  | N  | N  |
| #119 | Y      | N  | Y      | N  | N  | N  |
| #120 | Y      | N  | Y      | N  | N  | N  |
| #121 | Y      | N  | Y      | N  | N  | N  |
